# Supplementary material for: Urinary peptidomic profiles to address age-related disabilities: a prospective population study
Source: PubMed Central journal article supplement — Lancet Healthy Longev. 2021 Nov;2(11):e690–703. doi: 10.1016/S2666-7568(21)00226-9 (PMC8566278; doi:10.1016/s2666-7568(21)00226-9), 2021-11
Supplement: mmc1.pdf [file mmc1.pdf]

# THE LANCET

## Healthy Longevity

### Supplementary appendix

This appendix formed part of the original submission and has been peer reviewed. We post it as supplied by the authors.

Supplement to: Martens DS, Thijs L, Latosinska A, et al. Urinary peptidomic profiles to address age-related disabilities: a prospective population study. *Lancet Healthy Longev* 2021; published online Oct 14. [https://doi.org/10.1016/S2666-7568\(21\)00226-9](https://doi.org/10.1016/S2666-7568(21)00226-9).

# The Lancet Healthy Longevity

## Appendix

This web appendix formed part of the original submission and has been peer reviewed.  
Supplement to: *Urinary peptidomic profiles to address age-related disabilities: a prospective population study*

DS Martens, L Thijs, A Latosinska, S Trenson, J Siwy, Z-Y Zhang, C Wang, J Beige, A Vlahou, S Janssens, H Mischak, TS Nawrot, JA Staessen, the FLEMENGHO investigators

### Table of contents

|                                                                                                                                                                                        |     |
|----------------------------------------------------------------------------------------------------------------------------------------------------------------------------------------|-----|
| <b>Urinary proteomics</b>                                                                                                                                                              | p2  |
| Sample preparation and CE-MS analysis                                                                                                                                                  | p2  |
| CE-MS data processing                                                                                                                                                                  | p3  |
| Sequencing of peptides                                                                                                                                                                 | p3  |
| References                                                                                                                                                                             | p4  |
| <b>FLEMENGHO investigators</b>                                                                                                                                                         | p5  |
| <b>Table 1</b> Use of medications in 778 FLEMENGHO examined in 2005-2010                                                                                                               | p6  |
| <b>Table 2</b> Association of 210 sequenced urinary peptides with age in the 2005-2010 FLEMENGHO derivation dataset                                                                    | p7  |
| <b>Table 3</b> Association of age with 39 sequenced urinary peptides with the highest significance per identified protein in the FLEMENGHO derivation and internal validation datasets | p19 |
| <b>Table 4</b> Number of replicated sequenced urinary peptides associated with age in the FLEMENGHO derivation and internal validation datasets                                        | p21 |
| <b>Table 5</b> Weights assigned by elastic net regression to the multidimensional UPP biomarker reflecting ageing                                                                      | p23 |
| <b>Table 6</b> Risk biomarkers in relation to age in 778 FLEMENGHO with adjustment for clustering within families                                                                      | p27 |
| <b>Table 7</b> Risk of adverse health outcomes in relation to age in 778 FLEMENGHO with adjustment for clustering within families                                                      | p28 |
| <b>Table 8</b> Pathway analysis                                                                                                                                                        | p29 |
| <b>Table 9</b> Characteristics of FLEMENGHO participants analysed and not analysed                                                                                                     | p32 |
| <b>Figure 1</b> FLEMENGHO timelines                                                                                                                                                    | p33 |
| <b>Figure 2</b> Analysis strategy                                                                                                                                                      | p34 |
| <b>Figure 3</b> Residual plot of UPP-age on C-age                                                                                                                                      | p35 |
| <b>Figure 4</b> Short-term reproducibility of the UPP ageing biomarker                                                                                                                 | p36 |
| <b>Figure 5</b> Volcano plots for the FLEMENGHO datasets                                                                                                                               | p37 |

## **Urinary proteomics**

### ***Sample preparation and CE-MS analysis***

Sample preparation and CE-MS analysis were performed essentially as described.<sup>1</sup> Urine aliquots were thawed and 700  $\mu$ l mixed with 700  $\mu$ l of 2 M urea, 10 mM  $\text{NH}_4\text{OH}$  containing 0.02 % SDS. Subsequently, samples were ultrafiltered using a Centrstat 20 kDa cut-off centrifugal filter device (Satorius, Göttingen, Germany) to eliminate high molecular weight proteins. The obtained filtrate was desalted using a PD 10 gel filtration column (GE Healthcare Bio Sciences, Uppsala, Sweden) to remove urea, electrolytes and salts as well as to enrich polypeptides. The samples were lyophilised and stored at 4°C before usage. Shortly before CE-MS analysis, the samples were re-suspended in 10  $\mu$ L HPLC-grade  $\text{H}_2\text{O}$ . Samples were injected into CE-MS with 2 psi for 99 sec, resulting in injection volumes of ~280 nL.

A P/ACE MDQ capillary electrophoresis system (Beckman Coulter, Fullerton, CA) was coupled with a Micro-TOF MS (Bruker Daltonic, Bremen, Germany). A solution of 20% acetonitrile (Sigma-Aldrich, Taufkirchen, Germany) in HPLC-grade water (Roth, Karlsruhe, Germany) supplemented with 0.94% formic acid (Sigma-Aldrich) was used as running buffer. For CE-MS analysis, the electrospray ionisation interface from Agilent Technologies (Palo Alto, CA) was set to a potential of -4.0 to -4.5 kV. Spectra were recorded over an  $m/z$  range of 350-3000 and accumulated every 3 s.

### ***CE-MS data processing***

After the CE-MS analysis, mass spectral ion peaks representing identical molecules at different charge states were deconvoluted into single masses using MosaFinder software.<sup>2</sup> Only signals with  $z > 1$  observed in a minimum of 3 consecutive spectra with a signal-to-noise ratio of at least 4 were considered. The resulting peak list characterizes each polypeptide by

its mass and migration time. Data were calibrated utilising 150 reference mass data points and 452 reference migration time data points by applying global and local linear regression, respectively. Reference signals of 29 abundant collagen peptide fragments were used as internal standards for calibration using local linear regression.<sup>3</sup> These 29 peptides were selected, based on their high abundance and lack of association with disease. This procedure reproducibly addresses both analytical and dilution variances in a single calibration step and performs better than standardisation based on the urinary creatinine concentration.<sup>3</sup> The obtained peak list characterises each polypeptide by its calibrated molecular mass [Da], calibrated CE migration time [min] and normalised signal intensity. All detected peptides are deposited, matched, and annotated in a Microsoft SQL database allowing further statistical analysis.

### ***Sequencing of peptides***

Candidate biomarkers were sequenced using CE-MS/MS or LC-MS/MS analysis, as described in detail.<sup>4</sup> MS/MS experiments were using an Ultimate 3000 nano-flow system (Dionex/LC Packings, USA) or a P/ACE MDQ capillary electrophoresis system (Beckman Coulter, Fullerton, CA), both connected to an LTQ Orbitrap hybrid mass spectrometer (Thermo Fisher Scientific, Germany) equipped with a nano-electrospray ion source. The mass spectrometer is operated in data-dependent mode to automatically switch between MS and MS/MS acquisition. Survey full-scan MS spectra (from  $m/z$  300–2,000) were acquired in the Orbitrap. Ions were sequentially isolated for fragmentation. Data files were searched against the UniProt human nonredundant database using Proteome Discoverer 2.4 and the SEQUEST search engine. Relevant settings were: no fixed modifications, oxidation of methionine and proline as variable modifications. The minimum precursor mass was set to 790 Da, maximum precursor mass to 6000 Da with a minimum peak count of 10. The high-

confidence peptides were defined by cross-correlation ( $X_{corr}$ )  $>1.9$  and rank = 1. Precursor mass tolerance and fragment mass tolerance were 5 ppm and 0.05 Da, respectively. For further validation of obtained peptide sequences, the correlation between peptide charge at the working pH of 2 and CE-migration time was utilised to minimise incorrect sequence assignment:<sup>5</sup> calculated CE-migration time of the sequence candidate based on its peptide sequence (number of basic amino acids) was compared to the experimental migration time.

## References

1. Mischak H, Vlahou A, Ioannidis JPA. Technical aspects and inter-laboratory variability in native peptide profiling: the CE-MS experience. *Clin Biochem* 2013; **46**: 432-43.
2. Latosinska A, Siwy J, Mischak H, Frantzi M. Peptidomics and proteomics based on CE-MS as a robust tool in clinical application : the past, the present, and the future. *Electrophoresis* 2019; **40**: 2294-2308.
3. Jantos-Siwy J, Schiffer E, Brand K, et al. Quantitative urinary proteome analysis for biomarker evaluation in chronic kidney disease. *J Proteome Res* 2009; **8**: 268-81.
4. Klein J, Papadopoulos T, Mischak H, Mullen W. Comparison of CE-MS/MS and LC-MS/MS sequencing demonstrates significant complementarity in natural peptide identification in human urine. *Electrophoresis* 2014; **35**: 1060-64.
5. Zürgbig P, Renfrow MB, Schiffer E, et al. Biomarker discovery by CE-MS enables sequence analysis via MS/MS with platform-independent separation. *Electrophoresis* 2006; **27**: 2111-25.

**FLEMENGHO investigators**

*Research Unit Hypertension and Cardiovascular Epidemiology, KU Leuven Department of Cardiovascular Sciences, University of Leuven, Leuven, Belgium* — Prof K Asayama MD (current), Prof M Bochud MD (2008-2009), Prof J Boggia MD (2009-2012), Prof J Brguljan-Hitij MD (2011-2012), Prof YM Feng MD (2017-2019), YM Gu (2012-2016), A Hara PhD (2015), QF Huang MD (2016-2019), Y Jin MD (2008-2012), J Seidlerova MD (2008), YP Liu MD (2011-2014), JD Melgarejo MD (current), P Moliterno MSc (2017), Prof AN Odili MD (2010-2012), T Petit MD (2015-2016), A Raaijmakers MD (2015-2017), Prof R Schutte PhD (2012), Prof JA Staessen MD (current), Prof K Stolarz-Skrzypek MD (2009-2012), L Thijs MSc (current), V Tikhonoff MD (2008-2010), Prof JG Wang MD (2007-2008), FF Wei MD (2014-2019), DM Wei MD (current), Prof WY Yang MD (2014-2018), YL Yu MD (2019), Prof ZY Zhang MD (current).

*Centre for Environmental Sciences, Hasselt University, Hasselt, Belgium* — DS Martens PhD, Prof TS Nawrot PhD, HA Roels PhD, C Wang MSc.

*Mosaiques-Diagnostics GmbH, Hannover, Germany* — A Latosinska PhD, Prof H Mischak PhD, Justyna Siwy PhD.

*Non-Profit Research Institute Alliance for the Promotion of Preventive Medicine, Mechelen Belgium* — Prof K Asayama, Prof TW Hansen MD, Prof GE Maestre, Prof JA Staessen MD.

*Biomedical Sciences Group, Faculty of Medicine, University of Leuven, Leuven, Belgium* — Prof JA Staessen MD.

**Table 1: Use of medications in 778 FLEMENGHO examined in 2005-2010**

| Medications<br>(number taking drug [%])        | C-age             |         | UPP-age           |         | UPP-age-R           |         |
|------------------------------------------------|-------------------|---------|-------------------|---------|---------------------|---------|
|                                                | $\Delta$ (95% CI) | p value | $\Delta$ (95% CI) | p value | $\Delta$ (95% CI)   | p value |
| Antihypertensive drugs                         |                   |         |                   |         |                     |         |
| Any (198 [25.4])                               | 17.9 (15.6, 20.1) | <0.0001 | 14.8 (12.6, 16.9) | <0.0001 | 0.92 (-0.33, 2.17)  | 0.15    |
| Diuretics (78 [10.0])                          | 19.4 (16.0, 22.8) | <0.0001 | 17.1 (14.0, 20.2) | <0.0001 | 2.07 (0.35, 3.79)   | 0.018   |
| $\beta$ Bs (114 [14.7])                        | 17.5 (14.6, 20.3) | <0.0001 | 14.8 (12.2, 17.4) | <0.0001 | 1.27 (-0.20, 2.75)  | 0.091   |
| RAS inhibitors including $\beta$ Bs (21 [2.7]) | 22.6 (16.2, 28.9) | <0.0001 | 20.8 (15.1, 26.5) | <0.0001 | 3.34 (0.22, 6.46)   | 0.036   |
| RAS inhibitors excluding $\beta$ Bs (45 [5.8]) | 17.7 (13.3, 22.1) | <0.0001 | 13.4 (9.4, 17.4)  | <0.0001 | -0.33 (-2.62, 1.95) | 0.78    |
| Vasodilators (38 [4.9])                        | 18.5 (13.8, 23.3) | <0.0001 | 13.7 (9.4, 17.9)  | <0.0001 | -0.69 (-3.02, 1.63) | 0.56    |
| Monotherapy (41 [5.3])                         | 12.3 (7.8, 16.9)  | <0.0001 | 12.2 (8.0, 16.4)  | <0.0001 | 2.65 (0.32, 4.98)   | 0.026   |
| Combination therapy (157 [20.2])               | 19.3 (16.8, 21.8) | <0.0001 | 15.4 (13.1, 17.8) | <0.0001 | 0.47 (-0.86, 1.80)  | 0.49    |
| Antidiabetic drugs (22 [2.8])                  | 19.0 (12.8, 25.3) | <0.0001 | 17.6 (12.0, 23.2) | <0.0001 | 2.86 (-0.17, 5.88)  | 0.064   |
| NSAID (73 [9.4])                               | 5.6 (1.9, 9.2)    | 0.0028  | 4.9 (1.7, 8.1)    | 0.0029  | 0.60 (-1.19, 2.38)  | 0.51    |
| Lipid-lowering drugs                           |                   |         |                   |         |                     |         |
| Any (110 [14.1])                               | 17.4 (14.6, 20.3) | <0.0001 | 14.2 (11.5, 16.8) | <0.0001 | 0.69 (-0.81, 2.18)  | 0.37    |
| Statins (101 [13.0])                           | 17.2 (14.3, 20.2) | <0.0001 | 13.7 (10.9, 16.4) | <0.0001 | 0.30 (-1.23, 1.84)  | 0.70    |
| Any combination of the above (298 [38.3])      | 14.5 (12.4, 16.5) | <0.0001 | 12.2 (10.3, 14.1) | <0.0001 | 1.00 (-0.10, 2.10)  | 0.075   |

Abbreviations:  $\beta$ Bs, b-blockers; RAS, renin-angiotensin system; NSAID, non-steroidal anti-inflammatory drugs. RAS inhibitors include angiotensin-conversion inhibitors and angiotensin receptor blockers with or without  $\beta$ Bs. Lipid-lowering drugs include fibrates, ezetimibe, cholestyramine and statins.  $\Delta$  is the age difference, given with 95% confidence interval, was obtained by subtracting non-users from users. In all comparisons, 480 participants not taking any of the listed drugs were the reference. Because of combination therapy, numbers are not additive. C-age and UPP-age refer to chronological age and age as predicted by the UPP. UPP-age-R refers to the residual of the regression of UPP-age on C-age and reflects accelerated ageing as predicted by the UPP-age, independent of C-age.

**Table 2: Association of 210 sequenced urinary peptides with age in the 2005-2010 FLEMENGHO derivation dataset**

| Peptide ID number | Amino-acid sequence                                       | Parental proteins identified from the amino-acid sequence |                                 | $\beta$ (95% confidence interval) | p value   |
|-------------------|-----------------------------------------------------------|-----------------------------------------------------------|---------------------------------|-----------------------------------|-----------|
|                   |                                                           | Accession number                                          | Name                            |                                   |           |
| e08360            | TGYTGKMcESSVNYcE                                          | FAT4 (Q6V0I7)                                             | protocadherin fat 4             | 0.34 (0.27, 0.40)                 | 3.49 E-19 |
| e12851            | LDGAKGDAGPAGPKGEpG<br>SpGENGApG                           | COL1A1 (P02452)                                           | collagen type I alpha 1 chain   | -0.32 (-0.39, -0.25)              | 1.34 E-16 |
| e09697            | PGpPGPHGPPGpmGPHG<br>LpGP                                 | COL25A1 (Q9BXS0)                                          | collagen type XXV alpha 1 chain | 0.30 (0.23, 0.37)                 | 4.08 E-14 |
| e17856            | ARGNDGARGSDGQPGPp<br>GppGTAGFpGSpGAKGEV<br>GP             | COL3A1 (P02461)                                           | collagen type III alpha 1 chain | -0.30 (-0.38, -0.23)              | 4.05 E-13 |
| e05560            | GSpGSpGPDGKTGPPGp                                         | COL1A1 (P02452)                                           | collagen type I alpha 1 chain   | -0.29 (-0.36, -0.22)              | 5.88 E-13 |
| e20065            | ARGNDGARGSDGQpGpp<br>GPPGTAGFPpGSpGAKGEV<br>GpAGSpGSNGApG | COL3A1 (P02461)                                           | collagen type III alpha 1 chain | -0.28 (-0.36, -0.21)              | 9.64 E-12 |
| e19885            | ERGEQGPAGSpGFQGLpG<br>pAGppGEAGKpGEQGVPG<br>DLGAPGPSG     | COL1A1 (P02452)                                           | collagen type I alpha 1 chain   | -0.28 (-0.35, -0.20)              | 3.22 E-11 |
| e16966            | PpGESGREGApGAEGSpG<br>RDGSPGAKGDRGETGP                    | COL1A1 (P02452)                                           | collagen type I alpha 1 chain   | -0.27 (-0.34, -0.20)              | 4.31 E-11 |
| e10072            | GLpGTGGPpGENGKpGEp<br>GPKG                                | COL3A1 (P02461)                                           | collagen type III alpha 1 chain | -0.26 (-0.34, -0.19)              | 4.37 E-11 |
| e03016            | ApGDRGEPGPpGP                                             | COL1A1 (P02452)                                           | collagen type I alpha 1 chain   | -0.27 (-0.35, -0.20)              | 4.38 E-11 |
| e04820            | GVNVpSYGPpGPPG                                            | COL19A1 (Q14993)                                          | collagen type XIX alpha 1 chain | -0.27 (-0.35, -0.20)              | 6.71 E-11 |
| e04945            | SpGSPGPDGKTGPpGP                                          | COL1A1 (P02452)                                           | collagen type I alpha 1 chain   | -0.27 (-0.34, -0.19)              | 1.59 E-10 |
| e12949            | LDGAKGDAGPAGpKGEpG<br>SpGENGApG                           | COL1A1 (P02452)                                           | collagen type I alpha 1 chain   | -0.25 (-0.32, -0.18)              | 3.27 E-10 |
| e12986            | ADGQpGAKGEpGDAGAK<br>GDAGPPGPAGP                          | COL1A1 (P02452)                                           | collagen type I alpha 1 chain   | -0.25 (-0.32, -0.18)              | 6.39 E-10 |
| e13707            | GApQNGEPGGKGERGA<br>pGEKGEpGppG                           | COL3A1 (P02461)                                           | collagen type III alpha 1 chain | -0.25 (-0.32, -0.18)              | 3.31 E-09 |
| e17922            | NTGApGSPGVSGPKGDA<br>GQpGEKGSpGAQpPGAP<br>GPLG            | COL3A1 (P02461)                                           | collagen type III alpha 1 chain | -0.25 (-0.33, -0.18)              | 4.17 E-09 |



| Peptide ID number | Amino-acid sequence                                  | Parental proteins identified from the amino-acid sequence |                                 | $\beta$ (95% confidence interval) | p value   |
|-------------------|------------------------------------------------------|-----------------------------------------------------------|---------------------------------|-----------------------------------|-----------|
|                   |                                                      | Accession number                                          | Name                            |                                   |           |
| e17212            | RTGEVGA VGPPGFAGEKGS<br>PSGEAGTAGPPTpGPQG            | COL1A2 (P08123)                                           | collagen type I alpha 2 chain   | -0.24 (-0.31, -0.17)              | 4.86 E-09 |
| e11213            | ADGQPGAKGEPGDAGAK<br>GDAGPPGP                        | COL1A1 (P02452)                                           | collagen type I alpha 1 chain   | -0.24 (-0.31, -0.16)              | 7.21 E-09 |
| e02286            | PpGEAGKpGEQG                                         | COL1A1 (P02452)                                           | collagen type I alpha 1 chain   | -0.24 (-0.32, -0.17)              | 9.31 E-09 |
| e11415            | IGPpGPAGApGDKGESGP<br>SGPAGPTG                       | COL1A1 (P02452)                                           | collagen type I alpha 1 chain   | -0.24 (-0.31, -0.16)              | 9.55 E-09 |
| e11073            | NSGEpGApGSKGDTGAKG<br>EPGpVG                         | COL1A1 (P02452)                                           | collagen type I alpha 1 chain   | -0.24 (-0.32, -0.17)              | 1.17 E-08 |
| e06441            | TGSpGSpGPDGKTGPpGP                                   | COL1A1 (P02452)                                           | collagen type I alpha 1 chain   | -0.22 (-0.29, -0.15)              | 1.37 E-08 |
| e17983            | DGAPGQKGEMGPAGPTG<br>PRGFpGppGPDGLPGSMG<br>PP        | COL4A1 (P02462)                                           | collagen type IV alpha 1 chain  | -0.25 (-0.32, -0.17)              | 1.38 E-08 |
| e19745            | SKGESGNKGEpGSAGPQ<br>GPpGpSGEEGKRGNGEA<br>GSAGPPGPpG | COL1A2 (P08123)                                           | collagen type I alpha 2 chain   | -0.24 (-0.31, -0.16)              | 1.39 E-08 |
| e10987            | VGEpGpAGSKGESGNKGE<br>PGSAGP                         | COL1A2 (P08123)                                           | collagen type I alpha 2 chain   | -0.24 (-0.31, -0.16)              | 1.50 E-08 |
| e04419            | ApGDRGEpGPpGPAG                                      | COL1A1 (P02452)                                           | collagen type I alpha 1 chain   | -0.22 (-0.30, -0.15)              | 1.65 E-08 |
| e06068            | NDGApGKNGERGGpGGP                                    | COL3A1 (P02461)                                           | collagen type III alpha 1 chain | 0.24 (0.16, 0.32)                 | 2.09 E-08 |
| e06316            | GpPGEAGKpGEQGVpGD                                    | COL1A1 (P02452)                                           | collagen type I alpha 1 chain   | -0.23 (-0.31, -0.16)              | 3.54 E-08 |
| e06733            | AGSEADHEGTHSTKRG                                     | FGA (P02671)                                              | fibrinogen alpha chain          | 0.23 (0.16, 0.31)                 | 5.44 E-08 |
| e06709            | GSpGSpGPDGKTGPpGPA<br>G                              | COL1A1 (P02452)                                           | collagen type I alpha 1 chain   | -0.22 (-0.29, -0.15)              | 6.94 E-08 |
| e03025            | GQDGRpGPpGPpG                                        | COL1A1 (P02452)                                           | collagen type I alpha 1 chain   | -0.22 (-0.30, -0.15)              | 7.34 E-08 |
| e03322            | SpGPDGKTGPpGPA                                       | COL1A1 (P02452)                                           | collagen type I alpha 1 chain   | -0.22 (-0.29, -0.15)              | 7.61 E-08 |
| e06617            | MpGSpGGpGSDGKpGPpG                                   | COL3A1 (P02461)                                           | collagen type III alpha 1 chain | -0.22 (-0.29, -0.15)              | 1.04 E-07 |
| e17280            | AAGEpGKAGERGVpGPpG<br>AVGPAGKDGEAGAQQPP<br>GP        | COL1A1 (P02452)                                           | collagen type I alpha 1 chain   | -0.22 (-0.30, -0.15)              | 1.47 E-07 |
| e09891            | SEGSPGHpGQPGpGPpG<br>ApGP                            | COL3A1 (P02461)                                           | collagen type III alpha 1 chain | -0.22 (-0.30, -0.15)              | 1.92 E-07 |

| Peptide ID number | Amino-acid sequence                             | Parental proteins identified from the amino-acid sequence |                                 | $\beta$ (95% confidence interval) | p value   |
|-------------------|-------------------------------------------------|-----------------------------------------------------------|---------------------------------|-----------------------------------|-----------|
|                   |                                                 | Accession number                                          | Name                            |                                   |           |
| e04321            | PpGEAGKpGEQGVp                                  | COL1A1 (P02452)                                           | collagen type I alpha 1 chain   | -0.22 (-0.29, -0.14)              | 2.63 E-07 |
| e13033            | GpAGPPGEKGEPEGDDGP<br>SGAEGPpGPQ                | COL2A1 (P02458)                                           | collagen type II alpha 1 chain  | -0.22 (-0.29, -0.14)              | 3.05 E-07 |
| e12508            | KGNSEpGAPGSKGDTG<br>AKGEpGpVG                   | COL1A1 (P02452)                                           | collagen type I alpha 1 chain   | -0.22 (-0.29, -0.14)              | 3.26 E-07 |
| e07678            | TGSpGSpGPDGKTGPpGP<br>AG                        | COL1A1 (P02452)                                           | collagen type I alpha 1 chain   | -0.21 (-0.28, -0.14)              | 3.89 E-07 |
| e08978            | DEAGSEADHEGTHSTKRG                              | FGA (P02671)                                              | fibrinogen alpha chain          | 0.22 (0.14, 0.29)                 | 4.52 E-07 |
| e02667            | SpGPDGKTGpPGP                                   | COL1A1 (P02452)                                           | collagen type I alpha 1 chain   | -0.22 (-0.29, -0.14)              | 4.84 E-07 |
| e15129            | ERGEAGlpGVpGAKGEDG<br>KDGSPGEpGANG              | COL3A1 (P02461)                                           | collagen type III alpha 1 chain | -0.21 (-0.28, -0.13)              | 7.19 E-07 |
| e11013            | AGpPGEAGKpGEQGVPG<br>DLGApGP                    | COL1A1 (P02452)                                           | collagen type I alpha 1 chain   | -0.22 (-0.29, -0.14)              | 8.12 E-07 |
| e15778            | ESGREGAPGAEGSPGRD<br>GSpGAKGDRGETGp             | COL1A1 (P02452)                                           | collagen type I alpha 1 chain   | -0.21 (-0.28, -0.13)              | 8.14 E-07 |
| e17288            | GpGESGREGAPGAEGSp<br>GRDGSpGAKGDRGETGp          | COL1A1 (P02452)                                           | collagen type I alpha 1 chain   | -0.21 (-0.29, -0.14)              | 9.74 E-07 |
| e10025            | NSGEpGApGSKGDTGAKG<br>EpGP                      | COL1A1 (P02452)                                           | collagen type I alpha 1 chain   | -0.21 (-0.29, -0.14)              | 9.74 E-07 |
| e00966            | YQTNKAKH                                        | CSTB (P04080)                                             | cystatin B                      | 0.20 (0.13, 0.27)                 | 1.02 E-06 |
| e06961            | GLpGTGGPpGENGKPEp                               | COL3A1 (P02461)                                           | collagen type III alpha 1 chain | -0.21 (-0.28, -0.13)              | 1.09 E-06 |
| e01399            | DGRpGPpGpG                                      | COL1A1 (P02452)                                           | collagen type I alpha 1 chain   | -0.20 (-0.27, -0.13)              | 1.26 E-06 |
| e17890            | GpGADGQPGAkGEpGD<br>AGAKGDAGPPGpAGPAG<br>PPGpIG | COL1A1 (P02452)                                           | collagen type I alpha 1 chain   | -0.21 (-0.28, -0.13)              | 1.75 E-06 |
| e05114            | SpGSpGPDGKTGPPGp                                | COL1A1 (P02452)                                           | collagen type I alpha 1 chain   | -0.21 (-0.28, -0.13)              | 2.01 E-06 |
| e11777            | ANGApGNDGAKGDAGAp<br>GApGSQGAPG                 | COL1A1 (P02452)                                           | collagen type I alpha 1 chain   | -0.20 (-0.28, -0.13)              | 2.41 E-06 |
| e17787            | GARGLpGpPGSNGNPGPP<br>GPSGSPGKDGPPGPAGN<br>TGAP | COL3A1 (P02461)                                           | collagen type III alpha 1 chain | -0.20 (-0.28, -0.13)              | 2.42 E-06 |

| Peptide ID number | Amino-acid sequence                                 | Parental proteins identified from the amino-acid sequence |                                 | $\beta$ (95% confidence interval) | p value   |
|-------------------|-----------------------------------------------------|-----------------------------------------------------------|---------------------------------|-----------------------------------|-----------|
|                   |                                                     | Accession number                                          | Name                            |                                   |           |
| e18864            | SGPPGRAGEPGLQGPGAG<br>PpGEKGEPEGDDGpSGAEG<br>PpGPQG | COL2A1 (P02458)                                           | collagen type II alpha 1 chain  | -0.20 (-0.27, -0.12)              | 2.45 E-06 |
| e04169            | PpGEAGKpGEQGVp                                      | COL1A1 (P02452)                                           | collagen type I alpha 1 chain   | -0.20 (-0.27, -0.12)              | 2.52 E-06 |
| e11753            | GADGQPGAKGEPGDAGA<br>KGDAGppGP                      | COL1A1 (P02452)                                           | collagen type I alpha 1 chain   | -0.20 (-0.28, -0.13)              | 2.79 E-06 |
| e10277            | nGDDGEAGKpGRPGERG<br>PPGp                           | COL1A1 (P02452)                                           | collagen type I alpha 1 chain   | -0.20 (-0.28, -0.12)              | 2.79 E-06 |
| e11902            | ANGApGNDGAKGDAGAp<br>GApGSQGApG                     | COL1A1 (P02452)                                           | collagen type I alpha 1 chain   | -0.20 (-0.28, -0.12)              | 2.81 E-06 |
| e09435            | GEKGPSGEAGTAGPpGTp<br>GPQG                          | COL1A2 (P08123)                                           | collagen type I alpha 2 chain   | -0.19 (-0.26, -0.12)              | 3.00 E-06 |
| e14204            | GNEGpSGPPGpAGSPGER<br>GAAGSGGPIGpPG                 | COL11A2 (P13942)                                          | collagen type XI alpha 2 chain  | -0.20 (-0.28, -0.12)              | 3.11 E-06 |
| e14315            | NRGERGSEGSPPHpGQp<br>GPPGpPGApGP                    | COL3A1 (P02461)                                           | collagen type III alpha 1 chain | -0.19 (-0.26, -0.12)              | 4.53 E-06 |
| e12156            | GPAGpPGEKGEPEGDDGP<br>SGAEGPPGp                     | COL2A1 (P02458)                                           | collagen type II alpha 1 chain  | -0.20 (-0.27, -0.12)              | 4.61 E-06 |
| e15237            | ERGEAGIpGVpGAKGEDG<br>KDGSpGEpGANG                  | COL3A1 (P02461)                                           | collagen type III alpha 1 chain | -0.19 (-0.27, -0.12)              | 5.61 E-06 |
| e14015            | PSTTVAPGSFSTAATTSPG<br>ASGTTGVTTT                   | MUC19 (Q7Z5P9)                                            | mucin 19, oligomeric            | -0.19 (-0.27, -0.12)              | 7.24 E-06 |
| e08188            | GNDGApGKNGERGGpGG<br>pGP                            | COL3A1 (P02461)                                           | collagen type III alpha 1 chain | -0.19 (-0.26, -0.11)              | 7.58 E-06 |
| e05259            | DGQPGAKGEpGDAGAK                                    | COL1A1 (P02452)                                           | collagen type I alpha 1 chain   | -0.19 (-0.27, -0.12)              | 7.60 E-06 |
| e16548            | ADGQpGAKGEpGDAGAK<br>GDAGPpGPAGPAGPPGPI<br>G        | COL1A1 (P02452)                                           | collagen type I alpha 1 chain   | -0.19 (-0.26, -0.11)              | 7.65 E-06 |
| e10266            | NGDDGEAGKpGRpGERG<br>PPGP                           | COL1A1 (P02452)                                           | collagen type I alpha 1 chain   | -0.19 (-0.27, -0.12)              | 8.10 E-06 |
| e18250            | LALSKEKGDQGGPPGDPS<br>PGSPGPAGPAGPPGYGp<br>QGEP     | COL4A3 (Q01955)                                           | collagen type IV alpha 3 chain  | -0.19 (-0.27, -0.11)              | 8.85 E-06 |
| e03180            | ApGDRGEpGPPGp                                       | COL1A1 (P02452)                                           | collagen type I alpha 1 chain   | -0.19 (-0.27, -0.11)              | 1.05 E-05 |

| Peptide ID number | Amino-acid sequence                                      | Parental proteins identified from the amino-acid sequence |                                  | $\beta$ (95% confidence interval) | p value   |
|-------------------|----------------------------------------------------------|-----------------------------------------------------------|----------------------------------|-----------------------------------|-----------|
|                   |                                                          | Accession number                                          | Name                             |                                   |           |
| e06154            | EDGHpGKpGRpGERG                                          | COL1A2 (P08123)                                           | collagen type I alpha 2 chain    | -0.19 (-0.26, -0.11)              | 1.11 E-05 |
| e13825            | LTGPIGppGPAGAPGDKG<br>ESGPSGPAGPTG                       | COL1A1 (P02452)                                           | collagen type I alpha 1 chain    | -0.18 (-0.26, -0.11)              | 1.14 E-05 |
| e17946            | PpGPAGFAGPPGADGQP<br>GAKGEpGDAGAKGDAGP<br>PGPAGP         | COL1A1 (P02452)                                           | collagen type I alpha 1 chain    | -0.19 (-0.26, -0.11)              | 1.47 E-05 |
| e02311            | GpPGPpGpGpPpA                                            | COL8A1 (P27658)                                           | collagen type VIII alpha 1 chain | -0.18 (-0.26, -0.11)              | 2.26 E-05 |
| e07676            | NDGAPGKNGERGGpGGp<br>Gp                                  | COL3A1 (P02461)                                           | collagen type III alpha 1 chain  | -0.18 (-0.26, -0.11)              | 2.49 E-05 |
| e14837            | ERGSpGPAGPKGSpGEAG<br>RpGEAGLpGAKG                       | COL1A1 (P02452)                                           | collagen type I alpha 1 chain    | -0.18 (-0.25, -0.10)              | 2.64 E-05 |
| e17311            | NTGApGSpGVSGpKGDAG<br>QpGEKGSPPGAP<br>Gp                 | COL3A1 (P02461)                                           | collagen type III alpha 1 chain  | -0.19 (-0.26, -0.11)              | 2.79 E-05 |
| e02933            | GppGPDGNKGEpG                                            | COL1A2 (P08123)                                           | collagen type I alpha 2 chain    | -0.18 (-0.25, -0.10)              | 3.81 E-05 |
| e06186            | SpGSPGpDGKTGPPGpAG                                       | COL1A1 (P02452)                                           | collagen type I alpha 1 chain    | -0.18 (-0.25, -0.10)              | 3.99 E-05 |
| e10386            | DAGAPGApGGKGDAGAp<br>GERGpPG                             | COL3A1 (P02461)                                           | collagen type III alpha 1 chain  | -0.17 (-0.25, -0.10)              | 4.99 E-05 |
| e05551            | VGPpGPPGpGpGPPS                                          | COL1A1 (P02452)                                           | collagen type I alpha 1 chain    | -0.18 (-0.25, -0.10)              | 5.59 E-05 |
| e03638            | SpGSpGPDGKTGPP                                           | COL1A1 (P02452)                                           | collagen type I alpha 1 chain    | -0.17 (-0.25, -0.10)              | 5.99 E-05 |
| e06024            | SpGSPGPDGKTGpPGPAG                                       | COL1A1 (P02452)                                           | collagen type I alpha 1 chain    | -0.17 (-0.25, -0.10)              | 6.47 E-05 |
| e07807            | GpPGpPGKNGDDGEAGKp<br>G                                  | COL1A1 (P02452)                                           | collagen type I alpha 1 chain    | -0.17 (-0.24, -0.09)              | 6.49 E-05 |
| e20087            | ARGNDGARGSDGQpGpP<br>GpGTAAGFpGSpGAKGEV<br>GpAGSpGSNGApG | COL3A1 (P02461)                                           | collagen type III alpha 1 chain  | -0.17 (-0.25, -0.10)              | 6.94 E-05 |
| e16540            | GPAGAAGARGNDGQPPG<br>AGPPGPVpAGGpGFpGA<br>PG             | COL2A1 (P02458)                                           | collagen type II alpha 1 chain   | -0.17 (-0.24, -0.09)              | 7.61 E-05 |
| e16170            | LTGSpGSpGpDGKTGPPG<br>PAGQDGRPGpGppG                     | COL1A1 (P02452)                                           | collagen type I alpha 1 chain    | -0.17 (-0.25, -0.09)              | 8.07 E-05 |
| e11325            | ADGQPGAKGEpGDAGAK<br>GDAGPPGp                            | COL1A1 (P02452)                                           | collagen type I alpha 1 chain    | -0.17 (-0.25, -0.09)              | 9.43 E-05 |

| Peptide ID number | Amino-acid sequence                                        | Parental proteins identified from the amino-acid sequence |                                   | $\beta$ (95% confidence interval) | p value   |
|-------------------|------------------------------------------------------------|-----------------------------------------------------------|-----------------------------------|-----------------------------------|-----------|
|                   |                                                            | Accession number                                          | Name                              |                                   |           |
| e09408            | GDDGEAGKpGRPGERGP<br>PGp                                   | COL1A1 (P02452)                                           | collagen type I alpha 1 chain     | -0.17 (-0.24, -0.09)              | 9.43 E-05 |
| e13792            | KGGpGDQGEpGpQGLPGF<br>SGPPGKEGE                            | COL9A2 (Q14055)                                           | collagen type IX alpha 2 chain    | -0.17 (-0.25, -0.09)              | 0.00010   |
| e03248            | EATEMcTQEc                                                 | PCDH9 (Q9HC56)                                            | protocadherin 9                   | 0.17 (0.09, 0.24)                 | 0.00012   |
| e16785            | GSVGDPGMEGPMGQRG<br>REGPMGpRGEAGpPGSG                      | COL17A1 (Q9UMD9)                                          | collagen type XVII alpha 1 chain  | -0.17 (-0.24, -0.09)              | 0.00013   |
| e18041            | NTGAPGSpGVSGpKGDAG<br>QpGEKGSpGAQpGpGAPG<br>PLG            | COL3A1 (P02461)                                           | collagen type III alpha 1 chain   | -0.17 (-0.25, -0.09)              | 0.00013   |
| e16219            | ppGAKGQEGAHGAPGAA<br>GNPpGAPGHVpGAPGpSGp<br>P              | COL22A1 (Q8NFW1)                                          | collagen type XXII alpha 1 chain  | -0.17 (-0.24, -0.09)              | 0.00014   |
| e07132            | EpGSpGENGAPGmGPR                                           | COL1A1 (P02452)                                           | collagen type I alpha 1 chain     | 0.16 (0.09, 0.24)                 | 0.00015   |
| e10771            | DGQPGAKGEPGDAGAKG<br>DAGPpGP                               | COL1A1 (P02452)                                           | collagen type I alpha 1 chain     | -0.16 (-0.24, -0.09)              | 0.00015   |
| e02795            | GPpGPDGNKGEpG                                              | COL1A2 (P08123)                                           | collagen type I alpha 2 chain     | -0.17 (-0.24, -0.09)              | 0.00016   |
| e11008            | pPGEEGKRGRGDpGTVG<br>PpGP                                  | COL5A2 (P05997)                                           | collagen type V alpha 2 chain     | -0.16 (-0.24, -0.09)              | 0.00016   |
| e20509            | QGPPGKNGETGPQGpG<br>pTGpGGDKGDTGPPGPQ<br>GLQGLPGTGGPPGENGK | COL3A1 (P02461)                                           | collagen type III alpha 1 chain   | -0.17 (-0.24, -0.09)              | 0.00016   |
| e05074            | DGHpGKpGRPGERG                                             | COL1A2 (P08123)                                           | collagen type I alpha 2 chain     | -0.16 (-0.23, -0.08)              | 0.00019   |
| e05830            | GPpGVPGpPGpGGSPGLP                                         | COL22A1 (Q8NFW1)                                          | collagen type XXII alpha 1 chain  | -0.16 (-0.24, -0.09)              | 0.00021   |
| e03183            | KPWAAQDGPKPG                                               | LRRC25 (Q8N386)                                           | leucine rich repeat containing 25 | -0.15 (-0.23, -0.08)              | 0.00024   |
| e08463            | DEAGSEADHEGTHSTKR                                          | FGA (P02671)                                              | fibrinogen alpha chain            | 0.16 (0.08, 0.24)                 | 0.00025   |
| e10573            | GPpGEAGKpGEQGVpGDL<br>GAPGP                                | COL1A1 (P02452)                                           | collagen type I alpha 1 chain     | -0.16 (-0.24, -0.09)              | 0.00025   |
| e00467            | DGKTGPpGPA                                                 | COL1A1 (P02452)                                           | collagen type I alpha 1 chain     | -0.16 (-0.23, -0.08)              | 0.00026   |
| e04843            | GPpGpPGpGpPGPPS                                            | COL1A1 (P02452)                                           | collagen type I alpha 1 chain     | -0.16 (-0.23, -0.08)              | 0.00026   |
| e11972            | ADGQpGAKGEPGDAGAK<br>GDAGpGPA                              | COL1A1 (P02452)                                           | collagen type I alpha 1 chain     | -0.16 (-0.23, -0.08)              | 0.00026   |

| Peptide ID number | Amino-acid sequence                             | Parental proteins identified from the amino-acid sequence |                                               | $\beta$ (95% confidence interval) | p value |
|-------------------|-------------------------------------------------|-----------------------------------------------------------|-----------------------------------------------|-----------------------------------|---------|
|                   |                                                 | Accession number                                          | Name                                          |                                   |         |
| e01155            | ApGDKGESGPS                                     | COL1A1 (P02452)                                           | collagen type I alpha 1 chain                 | -0.16 (-0.23, -0.08)              | 0.00034 |
| e12366            | GANGApGNDGAKGDAGA<br>pGApGSQGApG                | COL1A1 (P02452)                                           | collagen type I alpha 1 chain                 | -0.15 (-0.23, -0.08)              | 0.00036 |
| e10502            | DAGApGApGGKGDAGApG<br>ERGPpG                    | COL3A1 (P02461)                                           | collagen type III alpha 1 chain               | -0.16 (-0.23, -0.08)              | 0.00037 |
| e18492            | DLADGVSGGEGKGGSDG<br>GGSHRKEGEEADAPGVIP<br>GIVG | CD99 (P14209)                                             | CD99 molecule (Xg blood group)                | 0.15 (0.07, 0.22)                 | 0.00044 |
| e06220            | GHPDTLNQGEFKEL                                  | S100A9 (P06702)                                           | S100 calcium binding protein A9               | -0.15 (-0.23, -0.08)              | 0.00047 |
| e03354            | SpGERGETGPpGP                                   | COL3A1 (P02461)                                           | collagen type III alpha 1 chain               | -0.15 (-0.23, -0.07)              | 0.00055 |
| e13472            | LRGGAGpPGPEGKGA<br>GPpGPpGAAGTpG                | COL3A1 (P02461)                                           | collagen type III alpha 1 chain               | -0.15 (-0.22, -0.07)              | 0.00058 |
| e14735            | KNGETGPQGGpTGPG<br>GDKGDTGPpGPQG                | COL3A1 (P02461)                                           | collagen type III alpha 1 chain               | -0.15 (-0.22, -0.07)              | 0.00058 |
| e18377            | FAEEKAVADTRDQADGSR<br>ASVDSGSSEEQGGSSRA         | PIGR (P01833)                                             | polymeric immunoglobulin receptor             | 0.15 (0.07, 0.23)                 | 0.00058 |
| e18782            | GRPEAQPPPLSSEHKPV<br>AGDAVPgPKDGSAPVVR<br>GA    | VGF (O15240)                                              | VGF nerve growth factor inducible             | -0.15 (-0.22, -0.07)              | 0.00058 |
| e08228            | GEpGSpGENGApGQMGP<br>RG                         | COL1A1 (P02452)                                           | collagen type I alpha 1 chain                 | -0.15 (-0.23, -0.08)              | 0.00063 |
| e04947            | EpGKAGERGVpGPpG                                 | COL1A1 (P02452)                                           | collagen type I alpha 1 chain                 | -0.14 (-0.22, -0.07)              | 0.00066 |
| e12714            | pAGPPGEKGEpGDDGPS<br>GAEGPpGPQ                  | COL2A1 (P02458)                                           | collagen type II alpha 1 chain                | -0.15 (-0.23, -0.07)              | 0.00069 |
| e16656            | FAGpPGADGQpGAKGEQ<br>GEAGQKGDAGApGpQGP          | COL2A1 (P02458)                                           | collagen type II alpha 1 chain                | -0.15 (-0.23, -0.07)              | 0.00081 |
| e12235            | GQNGEpGGKGERGApGE<br>KGEgGPpG                   | COL3A1 (P02461)                                           | collagen type III alpha 1 chain               | -0.15 (-0.22, -0.07)              | 0.00083 |
| e02716            | KNDQnTSVSHA                                     | BRWD3 (Q6RI45)                                            | bromodomain and WD repeat domain containing 3 | -0.15 (-0.22, -0.07)              | 0.00085 |
| e10141            | PpGEAGKpGEQGVpGDLG<br>ApGP                      | COL1A1 (P02452)                                           | collagen type I alpha 1 chain                 | -0.15 (-0.23, -0.07)              | 0.00085 |

| Peptide ID number | Amino-acid sequence                          | Parental proteins identified from the amino-acid sequence |                                 | $\beta$ (95% confidence interval) | p value |
|-------------------|----------------------------------------------|-----------------------------------------------------------|---------------------------------|-----------------------------------|---------|
|                   |                                              | Accession number                                          | Name                            |                                   |         |
| e11780            | QNGEpGGKGERGApGEK<br>GEGGPpG                 | COL3A1 (P02461)                                           | collagen type III alpha 1 chain | -0.15 (-0.23, -0.07)              | 0.00085 |
| e06650            | EGSpGRDGSpGAKGDRG                            | COL1A1 (P02452)                                           | collagen type I alpha 1 chain   | -0.14 (-0.21, -0.06)              | 0.00086 |
| e06584            | DGApGKNGERGGpGGpG<br>P                       | COL3A1 (P02461)                                           | collagen type III alpha 1 chain | -0.15 (-0.23, -0.07)              | 0.00087 |
| e13697            | ApGPAGSRGApGPQGpRG<br>DKGETGERG              | COL3A1 (P02461)                                           | collagen type III alpha 1 chain | -0.15 (-0.22, -0.07)              | 0.00089 |
| e12556            | KNGDDGEAGKpGRPGER<br>GpPGPQG                 | COL1A1 (P02452)                                           | collagen type I alpha 1 chain   | -0.14 (-0.22, -0.07)              | 0.00094 |
| e13253            | EDGKDGSpGEpGANGLpG<br>AAGERGApG              | COL3A1 (P02461)                                           | collagen type III alpha 1 chain | -0.14 (-0.22, -0.07)              | 0.00094 |
| e16417            | RTGEVGA VGpPGFAGEK<br>PSGEAGTAGPpGTpGP       | COL1A2 (P08123)                                           | collagen type I alpha 2 chain   | -0.15 (-0.23, -0.07)              | 0.00095 |
| e17596            | GPpGESGREGApGAEGSp<br>GRDGSPGAKGDRGETGp<br>A | COL1A1 (P02452)                                           | collagen type I alpha 1 chain   | -0.14 (-0.21, -0.07)              | 0.00096 |
| e01923            | SpGERGETGpP                                  | COL3A1 (P02461)                                           | collagen type III alpha 1 chain | -0.15 (-0.22, -0.07)              | 0.00098 |
| e01758            | ApGDRGEpGpP                                  | COL1A1 (P02452)                                           | collagen type I alpha 1 chain   | -0.14 (-0.22, -0.07)              | 0.0010  |
| e00421            | DpGKNGDKG                                    | COL1A2 (P08123)                                           | collagen type I alpha 2 chain   | -0.15 (-0.22, -0.07)              | 0.0011  |
| e09521            | EGGKGAAGpPGPpGAAGT<br>pGLQG                  | COL3A1 (P02461)                                           | collagen type III alpha 1 chain | -0.14 (-0.22, -0.07)              | 0.0012  |
| e13850            | PpGKNGDDGEAGKpGRp<br>GERGppGPQ               | COL1A1 (P02452)                                           | collagen type I alpha 1 chain   | -0.13 (-0.21, -0.06)              | 0.0015  |
| e03890            | ApGDRGEpGpPGPA                               | COL1A1 (P02452)                                           | collagen type I alpha 1 chain   | -0.13 (-0.21, -0.06)              | 0.0017  |
| e11002            | AEGSpGRDGSpGAKGDR<br>GETGPA                  | COL1A1 (P02452)                                           | collagen type I alpha 1 chain   | -0.13 (-0.21, -0.06)              | 0.0017  |
| e16419            | EAGRDNpGNDGppGRD<br>GQPGHKGERGypG            | COL1A2 (P08123)                                           | collagen type I alpha 2 chain   | -0.13 (-0.21, -0.06)              | 0.0017  |
| e02711            | MNIGKpNAKDI                                  | EP400 (Q96L91)                                            | E1A binding protein P400        | 0.14 (0.06, 0.21)                 | 0.0018  |
| e15220            | LRGGAGPpGPEGKGA<br>GpPGpPGAAGTpGLQG          | COL3A1 (P02461)                                           | collagen type III alpha 1 chain | -0.14 (-0.21, -0.06)              | 0.0018  |

| Peptide ID number | Amino-acid sequence                              | Parental proteins identified from the amino-acid sequence |                                   | $\beta$ (95% confidence interval) | p value |
|-------------------|--------------------------------------------------|-----------------------------------------------------------|-----------------------------------|-----------------------------------|---------|
|                   |                                                  | Accession number                                          | Name                              |                                   |         |
| e11536            | NGDDGEAGKPRpGERG<br>PpGPQG                       | COL1A1 (P02452)                                           | collagen type I alpha 1 chain     | -0.13 (-0.20, -0.06)              | 0.0019  |
| e05236            | SpGSpGPDGKTGppGP                                 | COL1A1 (P02452)                                           | collagen type I alpha 1 chain     | -0.14 (-0.21, -0.06)              | 0.0020  |
| e15323            | VQGpGpAGEEGKRGAR<br>GEPGPTGLpGpG                 | COL1A1 (P02452)                                           | collagen type I alpha 1 chain     | -0.13 (-0.20, -0.06)              | 0.0021  |
| e04979            | GLpGTGGppGENGKPG                                 | COL3A1 (P02461)                                           | collagen type III alpha 1 chain   | -0.14 (-0.21, -0.06)              | 0.0022  |
| e16606            | ADGQpGAKGEpGDAGAK<br>GDAGpPGPAGPAGPpGPI<br>G     | COL1A1 (P02452)                                           | collagen type I alpha 1 chain     | -0.13 (-0.21, -0.06)              | 0.0022  |
| e08755            | EGSpGRDGSpGAKGDRG<br>ET                          | COL1A1 (P02452)                                           | collagen type I alpha 1 chain     | -0.13 (-0.21, -0.06)              | 0.0023  |
| e19868            | EEKAVADTRDQADGSRAS<br>VDSGSSEEQGSSRALVS<br>TLVPL | PIGR (P01833)                                             | polymeric immunoglobulin receptor | 0.13 (0.06, 0.21)                 | 0.0023  |
| e04457            | GSpGGpGSDGKpGpG                                  | COL3A1 (P02461)                                           | collagen type III alpha 1 chain   | -0.13 (-0.21, -0.06)              | 0.0024  |
| e13816            | ERGEAGIpGvPpGAKGEDG<br>KDGSpGEpG                 | COL3A1 (P02461)                                           | collagen type III alpha 1 chain   | -0.13 (-0.21, -0.06)              | 0.0025  |
| e06922            | GpGFGFRpGDpGPPGPPG                               | COL15A1 (P39059)                                          | collagen type XV alpha 1 chain    | -0.13 (-0.21, -0.06)              | 0.0027  |
| e10326            | SGEpGApGSKGDTGAKGE<br>pGPVG                      | COL1A1 (P02452)                                           | collagen type I alpha 1 chain     | -0.13 (-0.21, -0.06)              | 0.0029  |
| e17690            | pPGADGQPGAKGEpGDA<br>GAKGDAGppGPAGPAGPP<br>GPIG  | COL1A1 (P02452)                                           | collagen type I alpha 1 chain     | -0.13 (-0.21, -0.05)              | 0.0029  |
| e04664            | KSqAqSTDSSkDP                                    | KRT12 (Q99456)                                            | keratin 12                        | 0.13 (0.05, 0.21)                 | 0.0032  |
| e15070            | YGGSSGGSSGGGYGG<br>GSSSGHGGSSSGGYGG<br>GS        | KRT10 (P13645)                                            | keratin 10                        | 0.13 (0.05, 0.21)                 | 0.0032  |
| e18044            | GPTGAVGFAGPQpDGQ<br>pGVKGEpGEPGQKGDAG<br>SPGP    | COL5A2 (P05997)                                           | collagen type V alpha 2 chain     | -0.13 (-0.21, -0.05)              | 0.0032  |
| e18831            | DKGETGEQGDRIKGRH<br>GFSLQGppGppGSPGEQ<br>GP      | COL1A1 (P02452)                                           | collagen type I alpha 1 chain     | -0.13 (-0.20, -0.05)              | 0.0040  |



| Peptide ID number | Amino-acid sequence                   | Parental proteins identified from the amino-acid sequence |                                                  | $\beta$ (95% confidence interval) | p value |
|-------------------|---------------------------------------|-----------------------------------------------------------|--------------------------------------------------|-----------------------------------|---------|
|                   |                                       | Accession number                                          | Name                                             |                                   |         |
| e01784            | DGGGSPKGDVDP                          | FXYD2 (P54710)                                            | FXYD domain containing ion transport regulator 2 | -0.12 (-0.20, -0.05)              | 0.0045  |
| e15467            | GRDGNpGNDGPPGRDGGQpGHKGERGYpG         | COL1A2 (P08123)                                           | collagen type I alpha 2 chain                    | -0.12 (-0.20, -0.05)              | 0.0049  |
| e10668            | GpPGEAGKpGEEQVpGDLGAPGp               | COL1A1 (P02452)                                           | collagen type I alpha 1 chain                    | -0.13 (-0.21, -0.05)              | 0.0050  |
| e05369            | DGQpGAKGepGDAGAK                      | COL1A1 (P02452)                                           | collagen type I alpha 1 chain                    | -0.12 (-0.20, -0.05)              | 0.0052  |
| e05899            | SAPYPGGGGNGASGGGSGGS                  | PCDH7 (O60245)                                            | protocadherin 7                                  | -0.13 (-0.20, -0.05)              | 0.0052  |
| e01132            | cDDYRLcE                              | MGP (P08493)                                              | matrix Gla protein                               | 0.12 (0.04, 0.19)                 | 0.0053  |
| e06309            | VGPpGPpGPpGPpGPPSA                    | COL1A1 (P02452)                                           | collagen type I alpha 1 chain                    | -0.12 (-0.20, -0.05)              | 0.0054  |
| e17254            | ENGKpGEpGpKGDAGApGApGGKGDAGApGERGpPG  | COL3A1 (P02461)                                           | collagen type III alpha 1 chain                  | -0.12 (-0.20, -0.05)              | 0.0054  |
| e11498            | GNSGepGApGSKGDTGAKGEPGpVG             | COL1A1 (P02452)                                           | collagen type I alpha 1 chain                    | -0.12 (-0.20, -0.05)              | 0.0055  |
| e10863            | DGQPpGAKGepGDAGAKGDAGPPGp             | COL1A1 (P02452)                                           | collagen type I alpha 1 chain                    | -0.13 (-0.20, -0.05)              | 0.0056  |
| e12101            | ADGQpGAKGepGDAGAKGDAGPpGpA            | COL1A1 (P02452)                                           | collagen type I alpha 1 chain                    | -0.12 (-0.20, -0.04)              | 0.0056  |
| e09874            | DGESGRpGRPGERGLpGPpG                  | COL3A1 (P02461)                                           | collagen type III alpha 1 chain                  | -0.12 (-0.20, -0.05)              | 0.0060  |
| e11375            | NGApGNDGAKGDAGApGApGSQGApG            | COL1A1 (P02452)                                           | collagen type I alpha 1 chain                    | -0.12 (-0.20, -0.05)              | 0.0060  |
| e11537            | GKNGDDGEAGKpGRpGERGpG                 | COL1A1 (P02452)                                           | collagen type I alpha 1 chain                    | -0.12 (-0.20, -0.04)              | 0.0063  |
| e10483            | GPpGPpGKNGDDGEAGKpGRpG                | COL1A1 (P02452)                                           | collagen type I alpha 1 chain                    | -0.12 (-0.19, -0.04)              | 0.0068  |
| e07225            | pPGEAGKpGEEQVpGDLG                    | COL1A1 (P02452)                                           | collagen type I alpha 1 chain                    | -0.12 (-0.20, -0.04)              | 0.0069  |
| e10518            | DGPpGRDGGQpGHKGERGYpG                 | COL1A2 (P08123)                                           | collagen type I alpha 2 chain                    | -0.12 (-0.20, -0.04)              | 0.0070  |
| e17565            | GEPGITGLPGEKGMAGGHGPDGPKGSpGpSGTpGDTG | COL5A2 (P05997)                                           | collagen type V alpha 2 chain                    | 0.12 (0.04, 0.19)                 | 0.0071  |

| Peptide ID number | Amino-acid sequence                    | Parental proteins identified from the amino-acid sequence |                                                  | $\beta$ (95% confidence interval) | p value |
|-------------------|----------------------------------------|-----------------------------------------------------------|--------------------------------------------------|-----------------------------------|---------|
|                   |                                        | Accession number                                          | Name                                             |                                   |         |
| e11122            | AGPpGEAGKpGEQGVpGD<br>LGApGP           | COL1A1 (P02452)                                           | collagen type I alpha 1 chain                    | -0.12 (-0.20, -0.04)              | 0.0075  |
| e05671            | KpGEQGVpGDLGAPGp                       | COL1A1 (P02452)                                           | collagen type I alpha 1 chain                    | -0.12 (-0.20, -0.04)              | 0.0076  |
| e10445            | GNSGEpGApGSKGDTGAK<br>GEPGp            | COL1A1 (P02452)                                           | collagen type I alpha 1 chain                    | -0.12 (-0.20, -0.04)              | 0.0076  |
| e11193            | NSGEpGApGSKGDTGAKG<br>EpGPVG           | COL1A1 (P02452)                                           | collagen type I alpha 1 chain                    | -0.12 (-0.20, -0.04)              | 0.0081  |
| e05288            | FPGQTGPRGEMGQp                         | COL7A1 (Q02388)                                           | collagen type VII alpha 1 chain                  | 0.12 (0.04, 0.20)                 | 0.0084  |
| e09449            | KGNDGApGKNGERGGpG<br>GpGp              | COL3A1 (P02461)                                           | collagen type III alpha 1 chain                  | -0.11 (-0.19, -0.04)              | 0.0084  |
| e02592            | DDGEAGKpGRpG                           | COL1A1 (P02452)                                           | collagen type I alpha 1 chain                    | -0.11 (-0.19, -0.04)              | 0.0085  |
| e17047            | PpGESGREGApGAEGSpG<br>RDGSpGAKGDRGETGP | COL1A1 (P02452)                                           | collagen type I alpha 1 chain                    | -0.12 (-0.20, -0.04)              | 0.0085  |
| e10881            | NGEpGGKGERGAPGEKG<br>EGGppG            | COL3A1 (P02461)                                           | collagen type III alpha 1 chain                  | -0.12 (-0.19, -0.04)              | 0.0088  |
| e11452            | ADGQpGAKGEpGDAGAK<br>GDAGPPGp          | COL1A1 (P02452)                                           | collagen type I alpha 1 chain                    | -0.12 (-0.20, -0.04)              | 0.0088  |
| e11559            | GRTGDAGPVGPPGPpGpp<br>GpPGPPS          | COL1A1 (P02452)                                           | collagen type I alpha 1 chain                    | -0.11 (-0.19, -0.04)              | 0.0090  |
| e10032            | EGSpGRDGSpGAKGDRG<br>ETGP              | COL1A1 (P02452)                                           | collagen type I alpha 1 chain                    | -0.12 (-0.20, -0.04)              | 0.0091  |
| e02858            | EAGGGNSLQNSP                           | FRMD4A (Q9P2Q2)                                           | FERM domain containing 4A                        | -0.11 (-0.19, -0.04)              | 0.0094  |
| e07275            | NGApGNDGAKGDAGApG<br>ApG               | COL1A1 (P02452)                                           | collagen type I alpha 1 chain                    | -0.12 (-0.20, -0.04)              | 0.0094  |
| e06839            | GEDGHpGKpGRpGERG                       | COL1A2 (P08123)                                           | collagen type I alpha 2 chain                    | -0.11 (-0.19, -0.04)              | 0.0096  |
| e19279            | TSPSQQLIPVKNLSENIEIL                   | PKD1L2 (Q7Z442)                                           | polycystic kidney disease 1-like 2               | -0.11 (-0.19, -0.04)              | 0.0099  |
| e17095            | NKTLIYIL                               | UBAC2 (Q8NBM4)                                            | ubiquitin-associated domain-containing protein 2 | 0.11 (0.03, 0.18)                 | 0.011   |
| e02105            | PIQEGAPGRPG                            | COL4A2 (P08572)                                           | collagen type IV alpha 2 chain                   | -0.11 (-0.18, -0.03)              | 0.013   |
| e17751            | pPGPQGPSGLSIQGMpGm<br>pGEKGEKGDGLPGPQG | COL14A1 (Q05707)                                          | collagen type XIV alpha 1 chain                  | -0.11 (-0.19, -0.03)              | 0.015   |

| Peptide ID number | Amino-acid sequence                            | Parental proteins identified from the amino-acid sequence |                                                    | $\beta$ (95% confidence interval) | p value |
|-------------------|------------------------------------------------|-----------------------------------------------------------|----------------------------------------------------|-----------------------------------|---------|
|                   |                                                | Accession number                                          | Name                                               |                                   |         |
| e08916            | DDGEAGKpGRpGERGpP<br>GP                        | COL1A1 (P02452)                                           | collagen type I alpha 1 chain                      | -0.11 (-0.18, -0.03)              | 0.016   |
| e11850            | ADGQPGAKGEpGDAGAK<br>GDAGPPGpA                 | COL1A1 (P02452)                                           | collagen type I alpha 1 chain                      | -0.10 (-0.18, -0.03)              | 0.018   |
| e17505            | AGRpGEVGPpGPpGPAGE<br>KGSPGADGPAGAPGTpGP<br>QG | COL1A1 (P02452)                                           | collagen type I alpha 1 chain                      | -0.10 (-0.18, -0.03)              | 0.018   |
| e17599            | EEKAVADTRDQADGSRAS<br>VDSGSSEEQGGSSRA          | PIGR (P01833)                                             | polymeric immunoglobulin receptor                  | 0.10 (0.03, 0.18)                 | 0.022   |
| e00340            | cDDYRLc                                        | MGP (P08493)                                              | matrix Gla protein                                 | 0.10 (0.02, 0.17)                 | 0.024   |
| e05353            | GPpGKNGDDGEAGkPpG                              | COL1A1 (P02452)                                           | collagen type I alpha 1 chain                      | -0.10 (-0.18, -0.02)              | 0.024   |
| e11906            | QNGEpGGKGERGApGEK<br>GEGGppG                   | COL3A1 (P02461)                                           | collagen type III alpha 1 chain                    | -0.10 (-0.18, -0.02)              | 0.027   |
| e07799            | GPpGEAGKpGEQGVPGDL<br>G                        | COL1A1 (P02452)                                           | collagen type I alpha 1 chain                      | -0.10 (-0.17, -0.02)              | 0.028   |
| e12661            | GKNGDDGEAGKpGRpGE<br>RGpPpGpQ                  | COL1A1 (P02452)                                           | collagen type I alpha 1 chain                      | -0.10 (-0.17, -0.02)              | 0.031   |
| e11668            | GGpGSDGKPGppGSQGE<br>SGRPGpPpG                 | COL3A1 (P02461)                                           | collagen type III alpha 1 chain                    | -0.10 (-0.17, -0.02)              | 0.038   |
| e06256            | TGLSMDGGGSPKGDVDP                              | FXD2 (P54710)                                             | FXD domain containing ion transport<br>regulator 2 | -0.09 (-0.17, -0.02)              | 0.039   |
| e10554            | EGSpGRDGSpGAKGDRG<br>ETGPA                     | COL1A1 (P02452)                                           | collagen type I alpha 1 chain                      | -0.09 (-0.17, -0.01)              | 0.044   |
| e00579            | EGRQKESV                                       | PPP1R3A (Q16821)                                          | protein phosphatase 1 regulatory subunit 3A        | 0.09 (0.01, 0.17)                 | 0.048   |
| e04647            | DGPpGRDGGpGHKG                                 | COL1A2 (P08123)                                           | collagen type I alpha 2 chain                      | -0.09 (-0.17, -0.01)              | 0.049   |
| e16771            | GADGQpGAKGEpGDAGA<br>KGDAGPPGPAGPpG<br>PIG     | COL1A1 (P02452)                                           | collagen type I alpha 1 chain                      | -0.09 (-0.17, -0.01)              | 0.049   |

The derivation study included the baseline data of 559 FLEMENGHO participants. The lower-case letters in the amino-acid sequence identify post-translational modifications: c, disulphide bridges; m, oxidized methionine; n, deaminated asparagine; p, hydroxylated proline; k, hydroxylated lysine; q, deaminated glutamine. Accession numbers refer to the Uniprot database (<http://www.uniprot.org/uniprot>). Association sizes ( $\beta$ ) between urinary peptides and age were expressed per 10-year increment and were adjusted for sex, mean arterial pressure (diastolic blood pressure plus one third of pulse pressure (the difference between systolic and diastolic blood pressure), body mass index, plasma glucose,  $\gamma$ -glutamyltransferase as index of alcohol intake, current smoking, the total-to-high-density-lipoprotein serum cholesterol ratio, and the glomerular filtration rate calculated from serum creatinine by the Chronic Kidney Disease Epidemiology Collaboration equation. p-values were corrected for the Benjamini-Hochberg false discovery rate for 635 tested associations.

**Table 3: Association of age with 39 sequenced urinary peptides with the highest significance per identified protein in the FLEMENGHO derivation and internal validation studies**

| Peptide ID number | Parental protein | Derivation and time-shifted internal validation study (n=559) |           |                       |           | Synchronous internal validation study (n=219) 2005-2010 |           |
|-------------------|------------------|---------------------------------------------------------------|-----------|-----------------------|-----------|---------------------------------------------------------|-----------|
|                   |                  | 2005-2010 (baseline)                                          |           | 2009-2013 (follow-up) |           | $\beta$ (95% CI)                                        | p value   |
|                   |                  | $\beta$ (95% CI)                                              | p value   | $\beta$ (95% CI)      | p value   |                                                         |           |
| e08360            | FAT4*            | 0.34 (0.27, 0.40)                                             | 1.09 E-21 | 0.25 (0.18, 0.32)     | 7.98 E-11 | 0.34 (0.24, 0.44)                                       | 1.01 E-10 |
| e12851            | COL1A1*          | -0.32 (-0.39, -0.25)                                          | 6.34 E-19 | -0.19 (-0.26, -0.11)  | 8.61 E-07 | -0.34 (-0.44, -0.23)                                    | 2.36 E-09 |
| e09697            | COL25A1*         | 0.30 (0.23, 0.37)                                             | 3.21 E-16 | 0.37 (0.30, 0.44)     | 3.91 E-23 | 0.25 (0.14, 0.36)                                       | 7.07 E-06 |
| e17856            | COL3A1*          | -0.30 (-0.38, -0.23)                                          | 3.83 E-15 | -0.17 (-0.24, -0.09)  | 2.75 E-05 | -0.34 (-0.45, -0.22)                                    | 1.39 E-08 |
| e04820            | COL19A1*         | -0.27 (-0.35, -0.20)                                          | 1.37 E-12 | -0.15 (-0.23, -0.08)  | 8.17 E-05 | -0.21 (-0.32, -0.09)                                    | 0.00037   |
| e17212            | COL1A2*          | -0.24 (-0.31, -0.17)                                          | 1.53 E-10 | -0.21 (-0.29, -0.14)  | 5.07 E-08 | -0.25 (-0.36, -0.14)                                    | 9.62 E-06 |
| e17983            | COL4A1*          | -0.25 (-0.32, -0.17)                                          | 5.44 E-10 | -0.18 (-0.25, -0.10)  | 1.09 E-05 | -0.18 (-0.30, -0.06)                                    | 0.0029    |
| e06733            | FGA*             | 0.23 (0.16, 0.31)                                             | 2.74 E-09 | 0.08 (0.00, 0.16)     | 0.054     | 0.18 (0.06, 0.30)                                       | 0.0031    |
| e13033            | COL2A1*          | -0.22 (-0.29, -0.14)                                          | 1.97 E-08 | -0.08 (-0.15, 0.00)   | 0.056     | -0.17 (-0.29, -0.05)                                    | 0.0051    |
| e00966            | CSTB*            | 0.20 (0.13, 0.27)                                             | 8.68 E-08 | 0.17 (0.10, 0.25)     | 1.61 E-05 | 0.20 (0.08, 0.32)                                       | 0.00082   |
| e14204            | COL11A2*         | -0.20 (-0.28, -0.12)                                          | 3.38 E-07 | -0.13 (-0.21, -0.06)  | 0.00079   | -0.22 (-0.34, -0.11)                                    | 0.00017   |
| e14015            | MUC19*           | -0.19 (-0.27, -0.12)                                          | 8.32 E-07 | -0.10 (-0.17, -0.02)  | 0.017     | -0.21 (-0.33, -0.09)                                    | 0.00054   |
| e18250            | COL4A3*          | -0.19 (-0.27, -0.11)                                          | 1.09 E-06 | -0.18 (-0.26, -0.11)  | 3.37 E-06 | -0.18 (-0.30, -0.06)                                    | 0.0035    |
| e02311            | COL8A1*          | -0.18 (-0.26, -0.11)                                          | 2.95 E-06 | -0.09 (-0.17, -0.01)  | 0.022     | -0.22 (-0.33, -0.10)                                    | 0.00019   |
| e13792            | COL9A2*          | -0.17 (-0.25, -0.09)                                          | 1.64 E-05 | -0.08 (-0.16, 0.00)   | 0.057     | -0.20 (-0.33, -0.08)                                    | 0.0014    |
| e03248            | PCDH9*           | 0.17 (0.09, 0.24)                                             | 2.01 E-05 | 0.13 (0.06, 0.21)     | 0.00071   | 0.18 (0.07, 0.30)                                       | 0.0022    |
| e16785            | COL17A1*         | -0.17 (-0.24, -0.09)                                          | 2.15 E-05 | -0.08 (-0.15, 0.00)   | 0.058     | -0.17 (-0.29, -0.05)                                    | 0.0065    |
| e16219            | COL22A1*         | -0.17 (-0.24, -0.09)                                          | 2.27 E-05 | -0.08 (-0.16, 0.00)   | 0.047     | -0.25 (-0.36, -0.14)                                    | 2.31 E-05 |
| e11008            | COL5A2*          | -0.16 (-0.24, -0.09)                                          | 2.85 E-05 | -0.07 (-0.15, 0.00)   | 0.059     | -0.19 (-0.31, -0.07)                                    | 0.0016    |
| e03183            | LRRRC25*         | -0.15 (-0.23, -0.08)                                          | 4.47 E-05 | -0.08 (-0.16, -0.01)  | 0.036     | -0.19 (-0.30, -0.08)                                    | 0.00078   |
| e18492            | CD99§            | 0.15 (0.07, 0.22)                                             | 8.98 E-05 | 0.04 (-0.04, 0.12)    | 0.32      | 0.00 (-0.11, 0.12)                                      | 0.97      |

| Peptide ID number | Parental protein | Derivation and time-shifted internal validation study (n=559) |           |                       |         | Synchronous internal validation study (n=219) 2005-2010 |         |
|-------------------|------------------|---------------------------------------------------------------|-----------|-----------------------|---------|---------------------------------------------------------|---------|
|                   |                  | 2005-2010 (baseline)                                          |           | 2009-2013 (follow-up) |         | $\beta$ (95% CI)                                        | p value |
|                   |                  | $\beta$ (95% CI)                                              | p value   | $\beta$ (95% CI)      | p value |                                                         |         |
| e06220            | S100A9*          | -0.15 (-0.23, -0.08)                                          | 9.59 E-05 | -0.07 (-0.15, 0.01)   | 0.079   | -0.14 (-0.26, -0.02)                                    | 0.026   |
| e18377            | PIGR§            | 0.15 (0.07, 0.23)                                             | 0.00012   | -0.04 (-0.12, 0.04)   | 0.36    | -0.02 (-0.14, 0.11)                                     | 0.80    |
| e18782            | VEGF*            | -0.15 (-0.22, -0.07)                                          | 0.00012   | -0.10 (-0.18, -0.03)  | 0.0086  | -0.14 (-0.26, -0.02)                                    | 0.023   |
| e02716            | BRWD3*           | -0.15 (-0.22, -0.07)                                          | 0.00019   | -0.07 (-0.15, 0.01)   | 0.081   | -0.12 (-0.24, 0.00)                                     | 0.059   |
| e02711            | EP400‡           | 0.14 (0.06, 0.21)                                             | 0.00047   | -0.03 (-0.11, 0.05)   | 0.49    | 0.12 (0.00, 0.24)                                       | 0.049   |
| e06922            | COL15A1‡         | -0.13 (-0.21, -0.06)                                          | 0.00077   | -0.06 (-0.14, 0.02)   | 0.12    | -0.21 (-0.33, -0.09)                                    | 0.00073 |
| e04664            | KRT12†           | 0.13 (0.05, 0.21)                                             | 0.00092   | 0.10 (0.02, 0.17)     | 0.019   | 0.08 (-0.04, 0.19)                                      | 0.19    |
| e15070            | KRT10§           | 0.13 (0.05, 0.21)                                             | 0.00095   | 0.02 (-0.06, 0.10)    | 0.69    | 0.06 (-0.07, 0.18)                                      | 0.37    |
| e01784            | FXD2‡            | -0.12 (-0.20, -0.05)                                          | 0.0013    | -0.06 (-0.14, 0.02)   | 0.14    | -0.11 (-0.23, 0.01)                                     | 0.080   |
| e05899            | PCDH7§           | -0.13 (-0.20, -0.05)                                          | 0.0016    | 0.01 (-0.07, 0.08)    | 0.89    | -0.05 (-0.18, 0.07)                                     | 0.37    |
| e01132            | MGP*             | 0.12 (0.04, 0.19)                                             | 0.0017    | 0.14 (0.06, 0.21)     | 0.00044 | 0.11 (-0.01, 0.22)                                      | 0.067   |
| e05288            | COL7A1§          | 0.12 (0.04, 0.20)                                             | 0.0031    | 0.05 (-0.03, 0.13)    | 0.20    | 0.07 (-0.05, 0.19)                                      | 0.26    |
| e02858            | FRMD4A‡          | -0.11 (-0.19, -0.04)                                          | 0.0037    | -0.04 (-0.12, 0.04)   | 0.35    | -0.13 (-0.25, -0.01)                                    | 0.034   |
| e19279            | PK1L2*           | -0.11 (-0.19, -0.04)                                          | 0.0038    | -0.10 (-0.17, -0.02)  | 0.0097  | -0.12 (-0.24, 0.01)                                     | 0.061   |
| e17095            | UBAC2§           | 0.11 (0.03, 0.18)                                             | 0.0043    | -0.03 (-0.10, 0.05)   | 0.49    | 0.08 (-0.04, 0.20)                                      | 0.22    |
| e02105            | COL4A2‡          | -0.11 (-0.18, -0.03)                                          | 0.0051    | 0.00 (-0.07, 0.08)    | 0.93    | -0.15 (-0.27, -0.03)                                    | 0.012   |
| e17751            | COL14A1†         | -0.11 (-0.19, -0.03)                                          | 0.0061    | -0.09 (-0.17, -0.02)  | 0.018   | -0.02 (-0.14, 0.10)                                     | 0.75    |
| e00579            | PPP1R3A‡         | 0.09 (0.01, 0.17)                                             | 0.022     | -0.05 (-0.13, 0.03)   | 0.22    | 0.12 (-0.01, 0.24)                                      | 0.066   |

Urinary peptides with the highest significance per identified protein were selected for this analysis to demonstrate consistency of the associations in 559 participants included in the derivation (2005-2010) and the time-shifted internal validation (2009-2013) datasets and in the 219 participants included in the synchronous internal validation dataset (2005-2010). Association sizes ( $\beta$ ) between the urinary peptides and age were expressed per 10-year increment and were adjusted for sex, mean arterial pressure (diastolic blood pressure plus one third of pulse pressure (the difference between systolic and diastolic blood pressure)), body mass index, plasma glucose,  $\gamma$ -glutamyltransferase as index of alcohol intake, current smoking, the total-to-high-density-lipoprotein serum cholesterol ratio, and the glomerular filtration rate calculated from serum creatinine by the Chronic Kidney Disease Epidemiology Collaboration equation. Symbols indicate validation status based on an p value of  $<0.10$  (given the prior probability established by the significance in the derivation dataset: \* replicated in the time-shifted and synchronous validation datasets; † replicated in the time-shifted internal validation dataset; ‡ replicated in the synchronous internal validation dataset; § not replicated).

**Table 4: Number of replicated sequenced urinary peptides identifying parental proteins in the FLEMENGHO derivation and internal validation datasets**

| Peptide ID number | Parental protein | Number of peptide fragments<br>(percentage replicated compared with derivation dataset) |                                     |                                    |
|-------------------|------------------|-----------------------------------------------------------------------------------------|-------------------------------------|------------------------------------|
|                   |                  | Derivation dataset<br>(2005-2010)                                                       | Time-shifted dataset<br>(2009-2013) | Synchronous dataset<br>(2005-2010) |
| e08360            | FAT4             | 1                                                                                       | 1 (100%)                            | 1 (100%)                           |
| e12851            | COL1A1           | 104                                                                                     | 87 (79%)                            | 94 (90%)                           |
| e09697            | COL25A1          | 1                                                                                       | 1 (100%)                            | 1 (100%)                           |
| e17856            | COL3A1           | 41                                                                                      | 34 (83%)                            | 39 (95%)                           |
| e04820            | COL19A1          | 1                                                                                       | 1 (100%)                            | 1 (100%)                           |
| e17212            | COL1A2           | 15                                                                                      | 10 (67%)                            | 13 (87%)                           |
| e17983            | COL4A1           | 1                                                                                       | 1 (100%)                            | 1 (100%)                           |
| e06733            | FGA              | 3                                                                                       | 3 (100%)                            | 3 (100%)                           |
| e13033            | COL2A1           | 6                                                                                       | 6 (100%)                            | 5 (83%)                            |
| e00966            | CSTB             | 1                                                                                       | 1 (100%)                            | 1 (100%)                           |
| e14204            | COL11A2          | 1                                                                                       | 1 (100%)                            | 1 (100%)                           |
| e14015            | MUC19            | 1                                                                                       | 1 (100%)                            | 1 (100%)                           |
| e18250            | COL4A3           | 1                                                                                       | 1 (100%)                            | 1 (100%)                           |
| e02311            | COL8A1           | 1                                                                                       | 1 (100%)                            | 1 (100%)                           |
| e13792            | COL9A2           | 1                                                                                       | 1 (100%)                            | 1 (100%)                           |
| e03248            | PCDH9            | 1                                                                                       | 1 (100%)                            | 1 (100%)                           |
| e16785            | COL17A1          | 1                                                                                       | 1 (100%)                            | 1 (100%)                           |
| e16219            | COL22A1          | 2                                                                                       | 2 (100%)                            | 2 (100%)                           |
| e11008            | COL5A2           | 3                                                                                       | 1 (33%)                             | 2 (67%)                            |
| e03183            | LRRC25           | 1                                                                                       | 1 (100%)                            | 1 (100%)                           |
| e18492            | CD99             | 1                                                                                       | 0 (0%)                              | 0 (0%)                             |
| e06220            | S100A9           | 1                                                                                       | 1 (100%)                            | 1 (100%)                           |
| e18377            | PIGR             | 3                                                                                       | 0 (0%)                              | 0 (0%)                             |
| e18782            | VGFB             | 1                                                                                       | 1 (100%)                            | 1 (100%)                           |
| e02716            | BRWD3            | 1                                                                                       | 1 (100%)                            | 1 (100%)                           |
| e02711            | EP400            | 1                                                                                       | 0 (0%)                              | 1 (100%)                           |
| e06922            | COL15A1          | 1                                                                                       | 0 (0%)                              | 1 (100%)                           |
| e04664            | KRT12            | 1                                                                                       | 1 (100%)                            | 0 (0%)                             |
| e15070            | KRT10            | 1                                                                                       | 0 (0%)                              | 0 (0%)                             |
| e01784            | FXYD2            | 2                                                                                       | 1 (50%)                             | 1 (50%)                            |
| e05899            | PCDH7            | 1                                                                                       | 0 (0%)                              | 0 (0%)                             |

| Peptide ID number | Parental protein | Number of peptide fragments<br>(percentage replicated compared with derivation dataset) |                                     |                                    |
|-------------------|------------------|-----------------------------------------------------------------------------------------|-------------------------------------|------------------------------------|
|                   |                  | Derivation dataset<br>(2005-2010)                                                       | Time-shifted dataset<br>(2009-2013) | Synchronous dataset<br>(2005-2010) |
| e01132            | MGP              | 2                                                                                       | 1 (50%)                             | 2 (100%)                           |
| e05288            | COL7A1           | 1                                                                                       | 0 (0%)                              | 0 (0%)                             |
| e02858            | FRMD4A           | 1                                                                                       | 0 (0%)                              | 1 (100%)                           |
| e19279            | PK1L2            | 1                                                                                       | 1 (100%)                            | 1 (100%)                           |
| e17095            | UBAC2            | 1                                                                                       | 0 (0%)                              | 0 (0%)                             |
| e02105            | COL4A2           | 1                                                                                       | 0 (0%)                              | 1 (100%)                           |
| e17751            | COL14A1          | 1                                                                                       | 1 (100%)                            | 0 (0%)                             |
| e00579            | PPP1R3A          | 1                                                                                       | 0 (0%)                              | 1 (100%)                           |

Replication indicates directionally similarly associated with chronological age with a p value of <0.1 (given the prior probability established by the significance in the derivation dataset).

**Table 5: Weights assigned by elastic net regression to the multidimensional UPP biomarker reflecting ageing**

| Peptide ID number | Amino-acid sequence                             | Parental protein identified from the amino-acid sequence |                                   | Weights<br>$\beta$ (95% confidence interval) |
|-------------------|-------------------------------------------------|----------------------------------------------------------|-----------------------------------|----------------------------------------------|
|                   |                                                 | Accession number                                         | Name                              |                                              |
| ...               | ...                                             | ...                                                      | ...                               | 58.92735 (intercept)                         |
| e12949            | LDGAKGDAGPAGpK<br>GEpGSpGENGApG                 | COL1A1 (P02452)                                          | collagen type I alpha 1 chain     | -0.009196 (-0.016636, -0.001756)             |
| e16219            | ppGAKGQEGAHGAP<br>GAAGNPGAPGHVGA<br>PGPSGpP     | COL22A1 (Q8NFW1)                                         | collagen type XXII alpha 1 chain  | -0.005926 (-0.010442, -0.001410)             |
| e11008            | pPGEEGKRGRGDp<br>GTVGPpGP                       | COL5A2 (P05997)                                          | collagen type V alpha 2 chain     | -0.004879 (-0.010490, 0.000732)              |
| e16966            | PpGESGREGApGAEG<br>SpGRDGSPGAKGDR<br>GETGP      | COL1A1 (P02452)                                          | collagen type I alpha 1 chain     | -0.003900 (-0.005744, -0.002056)             |
| e15467            | GRDGNpGNDGPPpGR<br>DGQpGHKGERGYpG               | COL1A2 (P08123)                                          | collagen type I alpha 2 chain     | -0.003467 (-0.006838, -0.000096)             |
| e06650            | EGSpGRDGSpGAKG<br>DRG                           | COL1A1 (P02452)                                          | collagen type I alpha 1 chain     | -0.003427 (-0.011087, 0.004233)              |
| e18250            | LALSGEKGDQGPPG<br>DPGSPGSPGAPGPA<br>GPPGYGpQGEP | COL4A3 (Q01955)                                          | collagen type IV alpha 3 chain    | -0.002831 (-0.005216, -0.000446)             |
| e03183            | KPWAAQDGPKPG                                    | LRRC25 (Q8N386)                                          | leucine rich repeat containing 25 | -0.002656 (-0.008705, 0.003393)              |
| e09435            | GEKGPSGEAGTAGPp<br>GTpGPQG                      | COL1A2 (P08123)                                          | collagen type I alpha 2 chain     | -0.002555 (-0.006981, 0.001871)              |
| e10072            | GLpGTGGPpGENGKp<br>GEpGPKG                      | COL3A1 (P02461)                                          | collagen type III alpha 1 chain   | -0.002533 (-0.005587, 0.000521)              |
| e04419            | ApGDRGEpGPpGPAG                                 | COL1A1 (P02452)                                          | collagen type I alpha 1 chain     | -0.002351 (-0.003339, -0.001363)             |
| e10881            | NGEpGGKGERGAPG<br>EKGEggppG                     | COL3A1 (P02461)                                          | collagen type III alpha 1 chain   | -0.002188 (-0.003979, -0.000397)             |
| e10141            | PpGEAGKPGEQGVp<br>GDLGApGP                      | COL1A1 (P02452)                                          | collagen type I alpha 1 chain     | -0.002027 (-0.004795, 0.000741)              |



| Peptide ID number | Amino-acid sequence                            | Parental protein identified from the amino-acid sequence |                                                    | Weights<br>$\beta$ (95% confidence interval) |
|-------------------|------------------------------------------------|----------------------------------------------------------|----------------------------------------------------|----------------------------------------------|
|                   |                                                | Accession number                                         | Name                                               |                                              |
| e16540            | GPAGAAGARGNDGQ<br>PGPAGPPGVPgAG<br>GpGFpGAPG   | COL2A1 (P02458)                                          | collagen type II alpha 1 chain                     | -0.001541 (-0.004379, 0.001297)              |
| e10025            | NSGEpGApGSKGDTG<br>AKGEpGP                     | COL1A1 (P02452)                                          | collagen type I alpha 1 chain                      | -0.001431 (-0.003144, 0.000282)              |
| e08755            | EGSpGRDGSpGAKG<br>DRGET                        | COL1A1 (P02452)                                          | collagen type I alpha 1 chain                      | -0.001387 (-0.003039, 0.000265)              |
| e06709            | GSpGSpGPDGKTGPp<br>GPAG                        | COL1A1 (P02452)                                          | collagen type I alpha 1 chain                      | -0.001228 (-0.002277, -0.000179)             |
| e12851            | LDGAKGDAGPAGPK<br>GEpGSpGENGApG                | COL1A1 (P02452)                                          | collagen type I alpha 1 chain                      | -0.001142 (-0.005999, 0.003715)              |
| e03016            | ApGDRGEPGPpGP                                  | COL1A1 (P02452)                                          | collagen type I alpha 1 chain                      | -0.001077 (-0.002990, 0.000836)              |
| e02667            | SpGPDGKTGPpPGP                                 | COL1A1 (P02452)                                          | collagen type I alpha 1 chain                      | -0.001020 (-0.002335, 0.000295)              |
| e06256            | TGLSMDGGGSPKGD<br>VDP                          | FXD2 (P54710)                                            | FXD domain containing ion<br>transport regulator 2 | -0.000890 (-0.003897, 0.002117)              |
| e17787            | GARGLpGpPGSNGNP<br>GPPGSPGKDGp<br>PGPAGNTGAP   | COL3A1 (P02461)                                          | collagen type III alpha 1 chain                    | -0.000889 (-0.001681, -0.000097)             |
| e15323            | VQGPpGpAGEEGKR<br>GARGEPTGLpGPp<br>G           | COL1A1 (P02452)                                          | collagen type I alpha 1 chain                      | -0.000788 (-0.002701, 0.001125)              |
| e05259            | DGQPGAKGEpGDAG<br>AK                           | COL1A1 (P02452)                                          | collagen type I alpha 1 chain                      | -0.000745 (-0.002142, 0.000652)              |
| e08188            | GNDGApGKNGERGG<br>pGGpGP                       | COL3A1 (P02461)                                          | collagen type III alpha 1 chain                    | -0.000644 (-0.001751, 0.000463)              |
| e10554            | EGSpGRDGSpGAKG<br>DRGETGPA                     | COL1A1 (P02452)                                          | collagen type I alpha 1 chain                      | -0.000592 (-0.000923, -0.000261)             |
| e05560            | GSpGSpGPDGKTGPP<br>Gp                          | COL1A1 (P02452)                                          | collagen type I alpha 1 chain                      | -0.000469 (-0.001290, 0.000352)              |
| e18041            | NTGAPGSpGVSpKG<br>DAGQpGEKGSpGAQ<br>GppGAPGPLG | COL3A1 (P02461)                                          | collagen type III alpha 1 chain                    | -0.000247 (-0.000405, -0.000089)             |

| Peptide ID number | Amino-acid sequence                               | Parental protein identified from the amino-acid sequence |                                   | Weights<br>$\beta$ (95% confidence interval) |
|-------------------|---------------------------------------------------|----------------------------------------------------------|-----------------------------------|----------------------------------------------|
|                   |                                                   | Accession number                                         | Name                              |                                              |
| e15237            | ERGEAGIpGVpGAKG<br>EDGKDGSpGEpGAN<br>G            | COL3A1 (P02461)                                          | collagen type III alpha 1 chain   | -0.000221 (-0.000448, 0.000006)              |
| e11073            | NSGEpGApGSKGDTG<br>AKGEPGpVG                      | COL1A1 (P02452)                                          | collagen type I alpha 1 chain     | -0.000214 (-0.000441, 0.000013)              |
| e01758            | ApGDRGEpGpp                                       | COL1A1 (P02452)                                          | collagen type I alpha 1 chain     | -0.000147 (-0.000574, 0.000280)              |
| e19868            | EEKAVADTRDQADGS<br>RASVDSGSSEEQGG<br>SSRALVSTLVPL | PIGR (P01833)                                            | polymeric immunoglobulin receptor | 0.000228 (-0.000274, 0.000730)               |
| e00340            | cDDYRLc                                           | MGP (P08493)                                             | matrix Gla protein                | 0.000256 (-0.004713, 0.005225)               |
| e01132            | cDDYRLcE                                          | MGP (P08493)                                             | matrix Gla protein                | 0.000692 (-0.000233, 0.001617)               |
| e11452            | ADGQpGAKGEpGDA<br>GAKGDAGPPGp                     | COL1A1 (P02452)                                          | collagen type I alpha 1 chain     | 0.000735 (0.000174, 0.001296)                |
| e18377            | FAEEKAVADTRDQAD<br>GSRASVDSGSSEEQ<br>GGSSRA       | PIGR (P01833)                                            | polymeric immunoglobulin receptor | 0.000880 (-0.000684, 0.002444)               |
| e04664            | KSqAqSTDSSkDP                                     | KRT12 (Q99456)                                           | keratin 12                        | 0.000892 (-0.000596, 0.002380)               |
| e18492            | DLADGVSGGEGKGG<br>SDGGGSHRKEGEEA<br>DAPGVIPGIVG   | CD99 (P14209)                                            | CD99 molecule (Xg blood group)    | 0.000930 (-0.000693, 0.002553)               |
| e15070            | YGGSSGGSSGGG<br>YGGSSSGGHGGSS<br>SGGYGGGS         | KRT10 (P13645)                                           | keratin 10                        | 0.001110 (0.000308, 0.001912)                |
| e00966            | YQTNKAKH                                          | CSTB (P04080)                                            | cystatin B                        | 0.001170 (-0.002740, 0.005080)               |
| e10483            | GPpGPpGKNGDDGE<br>AGKpGRpG                        | COL1A1 (P02452)                                          | collagen type I alpha 1 chain     | 0.001437 (-0.000153, 0.003027)               |
| e17254            | ENGKPGEpGpKGDA<br>GApGApGGKGDAGAp<br>GERGpPG      | COL3A1 (P02461)                                          | collagen type III alpha 1 chain   | 0.001536 (0.000062, 0.003010)                |
| e08360            | TGYTGKMcESSVNYc<br>E                              | FAT4 (Q6V0I7)                                            | protocadherin fat 4               | 0.001842 (0.001209, 0.002475)                |

| Peptide ID number | Amino-acid sequence                                         | Parental protein identified from the amino-acid sequence |                                 | Weights $\beta$ (95% confidence interval) |
|-------------------|-------------------------------------------------------------|----------------------------------------------------------|---------------------------------|-------------------------------------------|
|                   |                                                             | Accession number                                         | Name                            |                                           |
| e20087            | ARGNDGARGSDGQp<br>GpPGPpGTAGFpGSp<br>GAKGEVpAGSpGSN<br>GApG | COL3A1 (P02461)                                          | collagen type III alpha 1 chain | 0.001871 (0.000758, 0.002984)             |
| e08916            | DDGEAGKPGRpGER<br>GpPGP                                     | COL1A1 (P02452)                                          | collagen type I alpha 1 chain   | 0.002693 (0.000829, 0.004557)             |
| e09874            | DGESGRpGRPGERG<br>LpGPPG                                    | COL3A1 (P02461)                                          | collagen type III alpha 1 chain | 0.002974 (0.000406, 0.005542)             |
| e14837            | ERGSpGPAGPKGSpG<br>EAGRpGEAGLpGAKG                          | COL1A1 (P02452)                                          | collagen type I alpha 1 chain   | 0.003067 (0.001293, 0.004841)             |
| e11537            | GKNGDDGEAGKPGR<br>pGERGpGP                                  | COL1A1 (P02452)                                          | collagen type I alpha 1 chain   | 0.003790 (0.000489, 0.007091)             |
| e05671            | KpGEQGVpGDLGAPG<br>p                                        | COL1A1 (P02452)                                          | collagen type I alpha 1 chain   | 0.003797 (0.001359, 0.006235)             |
| e07799            | GPpGEAGKpGEQGV<br>PGDLG                                     | COL1A1 (P02452)                                          | collagen type I alpha 1 chain   | 0.003847 (0.001072, 0.006622)             |
| e09697            | PGpPGPHGPPGpmG<br>PHGLpGP                                   | COL25A1 (Q9BXS0)                                         | collagen type XXV alpha 1 chain | 0.005429 (0.003867, 0.006991)             |
| e17505            | AGRpGEVGPpGPpGP<br>AGEKGSPPGADGPAG<br>APGTpGPQG             | COL1A1 (P02452)                                          | collagen type I alpha 1 chain   | 0.005701 (-0.002982, 0.014384)            |
| e09521            | EGGKGAAGpPGPPG<br>AAGTpGLQG                                 | COL3A1 (P02461)                                          | collagen type III alpha 1 chain | 0.005761 (0.000716, 0.010806)             |
| e10386            | DAGAPGApGGKGDA<br>GApGERGpPG                                | COL3A1 (P02461)                                          | collagen type III alpha 1 chain | 0.006532 (0.003161, 0.009903)             |

The derivation study included the baseline data of 559 FLEMENGHO participants. Accession numbers refer to the Uniprot database (<http://www.uniprot.org/uniprot>). Association sizes ( $\beta$ ) between age and the abundance of the urinary peptides were derived by ELASTIC net regression, which was bootstrapped 1000 times. The regression slopes ( $\beta$ s) reflect the weight of each of the 54 peptide fragments in the construction of the multidimensional UPP marker. Of 210 peptides entering the data reduction analysis, 54 entered at least 60% of models and identified 17 proteins. The 95% confidence intervals of the  $\beta$ s were derived from the bootstrap distribution.

**Table 6: Risk biomarkers in relation to age in 778 FLEMENGHO examined from 2005-2010 with adjustment for clustering within families**

| Risk biomarkers              | Intrafamilial correlation |         | C-age |         | UPP-age |         | UPP-age-R |         |
|------------------------------|---------------------------|---------|-------|---------|---------|---------|-----------|---------|
|                              | ICC                       | p value | r     | p value | r       | p value | r         | p value |
| Vascular biomarkers          |                           |         |       |         |         |         |           |         |
| Systolic pressure            | 0.14                      | 0.00052 | 0.50  | <0.0001 | 0.47    | <0.0001 | 0.06      | 0.16    |
| Diastolic pressure           | 0.31                      | <0.0001 | 0.24  | <0.0001 | 0.23    | <0.0001 | 0.04      | 0.39    |
| VEGF                         | 0.41                      | <0.0001 | 0.15  | 0.00020 | 0.16    | 0.00010 | 0.04      | 0.28    |
| PAI-1                        | 0.24                      | <0.0001 | 0.07  | 0.085   | 0.09    | 0.037   | 0.05      | 0.27    |
| Renal biomarkers             |                           |         |       |         |         |         |           |         |
| eGFR                         | 0.19                      | <0.0001 | -0.73 | <0.0001 | -0.66   | <0.0001 | -0.05     | 0.23    |
| NGAL                         | 0.25                      | <0.0001 | 0.17  | <0.0001 | 0.19    | <0.0001 | 0.09      | 0.036   |
| Insulin resistance           |                           |         |       |         |         |         |           |         |
| Plasma glucose               | 0.33                      | <0.0001 | 0.27  | <0.0001 | 0.26    | <0.0001 | 0.05      | 0.21    |
| Serum insulin                | 0.14                      | 0.00053 | 0.00  | 0.99    | 0.04    | 0.36    | 0.07      | 0.085   |
| HOMA-IR                      | 0.07                      | 0.11    | 0.05  | 0.26    | 0.07    | 0.071   | 0.06      | 0.12    |
| Lipid biomarkers             |                           |         |       |         |         |         |           |         |
| Body mass index              | 0.28                      | <0.0001 | 0.34  | <0.0001 | 0.34    | <0.0001 | 0.10      | 0.021   |
| Waist circumference          | 0.28                      | <0.0001 | 0.36  | <0.0001 | 0.36    | <0.0001 | 0.09      | 0.022   |
| Body fat                     | -0.07                     | 0.11    | 0.39  | <0.0001 | 0.38    | <0.0001 | 0.08      | 0.069   |
| Leptin                       | 0.20                      | <0.0001 | 0.07  | 0.11    | 0.11    | 0.011   | 0.09      | 0.027   |
| Resistin                     | 0.27                      | <0.0001 | 0.04  | 0.31    | 0.04    | 0.28    | 0.01      | 0.72    |
| Inflammation biomarkers      |                           |         |       |         |         |         |           |         |
| C-reactive protein           | 0.08                      | 0.067   | 0.10  | 0.016   | 0.11    | 0.0097  | 0.04      | 0.36    |
| TNF $\alpha$                 | 0.23                      | <0.0001 | 0.25  | <0.0001 | 0.25    | <0.0001 | 0.07      | 0.10    |
| TNFR-1                       | 0.24                      | <0.0001 | 0.36  | <0.0001 | 0.34    | <0.0001 | 0.06      | 0.15    |
| Other markers                |                           |         |       |         |         |         |           |         |
| Daily tobacco use in smokers | 0.19                      | <0.0001 | -0.06 | 0.18    | -0.03   | 0.43    | 0.03      | 0.46    |
| FSH in 395 women             | 0.00                      | 0.98    | 0.66  | <0.0001 | 0.55    | <0.0001 | 0.01      | 0.87    |
| Framingham risk score        | 0.11                      | 0.0055  | 0.88  | <0.0001 | 0.76    | <0.0001 | -0.01     | 0.78    |
| dp-ucMGP                     | 0.13                      | 0.0010  | 0.41  | <0.0001 | 0.41    | <0.0001 | 0.10      | 0.019   |

Abbreviations: ICC, intraclass correlation coefficient (Donner A, Koval JJ. The estimation of intraclass correlation in the analysis of family data. *Biometrics*. 1980;36:19-25.); VEGF, vascular endothelial growth factor; PAI-1, plasminogen activator inhibitor-1; eGFR, glomerular filtration rate derived from serum creatinine; NGAL, neutrophil gelatinase-associated lipocalin; HOMA-IR, homeostatic model assessment insulin resistance; VCAM-1, vascular cell adhesion protein 1; VCAM-2, vascular cell adhesion protein 2; TNF $\alpha$ , tumour necrosis factor  $\alpha$ ; TNFR-1, tumour necrosis factor receptor-1; FSH, follicle stimulating hormone; dp-ucMGP, desphospho-uncarboxylated matrix Gla protein. The distributions of VEGF, PAI-1, NGAL, HOMA-IR, body fat, visceral fat, leptin, resistin, C-reactive protein, TNF $\alpha$ , TNFR-1, daily use of smoking materials, FSH, Framingham risk score and dp-ucMGP were rank normalised. *r* is the Pearson correlation coefficient. C-age and UPP-age refer to chronological age and age as predicted by the UPP. UPP-age-R refers to the residual of the regression of UPP-age on C-age and reflects rapid (accelerated) ageing as predicted by the UPP-age, independent of C-age.

**Table 7: Risk of adverse health outcomes in relation to age in 778 FLEMENGHO with adjustment for clustering within families**

| Endpoints                    | n/N (%)        | C-age            |         | UPP-age          |         | UPP-age-R        |         |
|------------------------------|----------------|------------------|---------|------------------|---------|------------------|---------|
|                              |                | HR (95%CI)       | p value | HR (95%CI)       | p value | HR (95%CI)       | p value |
| Mortality                    |                |                  |         |                  |         |                  |         |
| Total                        | 71/778 (9.1)   | 3.62 (2.87-4.57) | <0.0001 | 2.66 (2.22-3.19) | <0.0001 | 1.57 (1.20-2.05) | 0.00096 |
| Cardiovascular               | 24/778 (3.1)   | 7.27 (4.32-12.2) | <0.0001 | 3.15 (2.31-4.28) | <0.0001 | 1.81 (1.17-2.80) | 0.0075  |
| Non-cardiovascular           | 43/778 (5.5)   | 2.78 (2.10-3.67) | <0.0001 | 2.20 (1.78-2.72) | <0.0001 | 1.35 (0.94-1.92) | 0.10    |
| Fatal and non-fatal cancer   | 71/778 (9.1)   | 2.00 (1.67-2.40) | <0.0001 | 1.71 (1.47-1.98) | <0.0001 | 1.10 (0.81-1.49) | 0.53    |
| Musculoskeletal disorders    |                |                  |         |                  |         |                  |         |
| Osteoarticular complications | 162/778 (20.8) | 1.03 (0.93-1.14) | 0.61    | 1.07 (0.95-1.19) | 0.26    | 1.15 (0.94-1.40) | 0.18    |
| Osteoporosis and fractures   |                |                  |         |                  |         |                  |         |
| All                          | 68/778 (8.7)   | 1.24 (1.06-1.46) | 0.0083  | 1.34 (1.14-1.57) | 0.00046 | 1.40 (1.06-1.85) | 0.018   |
| Women                        | 48/395 (12.2)  | 1.55 (1.26-1.92) | 0.0001  | 1.54 (1.28-1.85) | <0.0001 | 1.43 (1.03-1.99) | 0.031   |
| Men                          | 20/383 (5.2)   | 0.82 (0.62-1.08) | 0.16    | 0.86 (0.62-1.19) | 0.36    | 1.19 (0.67-2.12) | 0.55    |

n/N are the number of incident endpoint/number of participants at risk. Hazard ratios (HR), given with 95% confidence interval, express the relative risk per 10-year increment. The cause of death was not documented 4 participants. C-age and UPP-age refer to chronological age and age as predicted by the UPP. UPP-age-R refers to the residual of the regression of UPP-age on C-age and reflects rapid (accelerated) ageing as predicted by the UPP-age, independent of C-age.

**Table 8: Pathway analysis**

| Pathway identifier | Pathway descriptor                                     | q value  | Proteins included                                                                                                                         |
|--------------------|--------------------------------------------------------|----------|-------------------------------------------------------------------------------------------------------------------------------------------|
| <i>Reactome</i>    |                                                        |          |                                                                                                                                           |
| R-hsa-8948216      | Collagen chain trimerisation                           | 1.12E-35 | COL25A1/ COL7A1/COL4A2/COL14A1/COL15A1/COL5A2/COL22A1/COL17A1/COL9A2/COL8A1/COL4A3/COL11A2/ COL2A1/COL1A2/COL4A1/COL19A1/ COL3A1/COL1A1   |
| R-hsa-1650814      | Collagen biosynthesis and modifying enzymes            | 4.96E-32 | COL25A1/COL7A1/COL4A2/COL14A1/COL15A1/COL5A2/COL22A1/COL17A1/COL9A2/COL8A1/COL4A3/COL11A2/ COL2A1/COL1A2/COL4A1/COL19A1/COL3A1/COL1A1     |
| R-hsa-1442490      | Collagen degradation                                   | 3.97E-30 | COL25A1/COL7A1/COL4A2/COL14A1/COL15A1/COL5A2/COL17A1/COL9A2/COL8A1/COL4A3/COL11A2/COL2A1/COL1 A2/COL4A1/COL19A1/COL3A1/COL1A1             |
| R-hsa-1474290      | Collagen formation                                     | 9.78E-30 | COL25A1/COL7A1/COL4A2/COL14A1/COL15A1/COL5A2/COL22A1/COL17A1/COL9A2/COL8A1/COL4A3/COL11A2/COL2 A1/COL1A2/COL4A1/COL19A1/COL3A1/COL1A1     |
| R-hsa-2022090      | Assembly of collagen fibrils and multimeric structures | 6.53E-26 | COL7A1/COL4A2/COL14A1/COL15A1/COL5A2/COL17A1/COL9A2/COL8A1/COL4A3/COL11A2/COL2A1/COL1A2/COL4A 1/COL3A1/COL1A1                             |
| R-hsa-1474228      | Degradation of the ECM                                 | 4.11E-24 | COL25A1/COL7A1/COL4A2/COL14A1/COL15A1/COL5A2/COL17A1/COL9A2/COL8A1/COL4A3/COL11A2/COL2A1/COL1 A2/COL4A1/COL19A1/COL3A1/COL1A1             |
| R-hsa-1474244      | ECM organisation                                       | 7.74E-22 | COL25A1/FGA/COL7A1/COL4A2/COL14A1/COL15A1/COL5A2/COL22A1/COL17A1/COL9A2/COL8A1/COL4A3/COL11A2/ COL2A1/COL1A2/COL4A1/COL19A1/COL3A1/COL1A1 |
| R-hsa-216083       | Integrin cell surface interactions                     | 1.78E-17 | FGA/COL7A1/COL4A2/COL5A2/COL9A2/COL8A1/COL4A3/COL2A1/COL1A2/COL4A1/COL3A1/COL1A1                                                          |
| R-hsa-3000171      | Non-integrin membrane ECM interactions                 | 2.34E-13 | COL4A2/COL5A2/COL4A3/COL11A2/COL2A1/COL1A2/COL4A1/COL3A1/COL1A1                                                                           |
| R-hsa-3000178      | ECM protoglycans                                       | 2.31E-12 | COL4A2/COL5A2/COL9A2/COL4A3/COL2A1/COL1A2/COL4A1/COL3A1/COL1A1                                                                            |
| R-hsa-2214320      | Anchoring fibril formation                             | 8.13E-12 | COL7A1/COL4A2/COL4A3/COL1A2/COL4A1/COL1A1                                                                                                 |
| R-hsa-419037       | NCAM1 interactions                                     | 8.63E-11 | COL4A2/COL5A2/COL9A2/COL4A3/COL2A1/COL4A1/COL3A1                                                                                          |
| R-hsa-8874081      | MET activates PTK2 signalling                          | 7.93E-10 | COL5A2/COL11A2/COL2A1/COL1A2/COL3A1/COL1A1                                                                                                |
| R-hsa-186797       | Signalling by PDGF                                     | 7.99E-10 | COL4A2/COL5A2/COL9A2/COL4A3/COL2A1/COL4A1/COL3A1                                                                                          |
| R-hsa-375165       | NCAM signalling for neurite outgrowth                  | 1.36E-09 | COL4A2/COL5A2/COL9A2/COL4A3/COL2A1/COL4A1/COL3A1                                                                                          |
| R-hsa-2243919      | Crosslinking of collagen fibrils                       | 4.04E-09 | COL4A2/COL4A3/COL1A2/COL4A1/COL1A1                                                                                                        |
| R-hsa-8875878      | MET promotes cell mobility                             | 4.49E-09 | COL5A2/COL11A2/COL2A1/COL1A2/COL3A1/COL1A1                                                                                                |

| Pathway identifier | Pathway descriptor                                                     | q value  | Proteins included                                                                                                                          |
|--------------------|------------------------------------------------------------------------|----------|--------------------------------------------------------------------------------------------------------------------------------------------|
| R-hsa-3000480      | Scavenging by class A receptors                                        | 4.87E-09 | COL4A2/COL1A2/COL4A1/COL3A1/COL1A1                                                                                                         |
| R-hsa-6806834      | Signalling by MET                                                      | 2.31E-07 | COL5A2/COL11A2/COL2A1/COL1A2/COL3A1/COL1A1                                                                                                 |
| R-hsa-2173782      | Binding and uptake of ligands by scavenger receptors                   | 3.06E-07 | COL4A2/COL1A2/COL4A1/COL3A1/COL1A1                                                                                                         |
| R-hsa-9006934      | Signalling by receptor tyrosine kinases                                | 1.08E-06 | COL4A2/COL5A2/COL9A2/COL4A3/COL11A2/COL2A1/COL1A2/COL4A1/COL3A1/COL1A1                                                                     |
| R-hsa-3000170      | Syndecan interactions                                                  | 2.42E-06 | COL5A2/COL1A2/COL3A1/COL1A1                                                                                                                |
| R-hsa-3000157      | Laminin interactions                                                   | 3.59E-06 | COL7A1/COL4A2/COL4A3/COL4A1                                                                                                                |
| R-hsa-198933       | Immunoregulatory interactions between a lymphoid and non-lymphoid cell | 3.88E-06 | CD99/COL17A1/COL2A1/COL1A2/COL3A1/COL1A1                                                                                                   |
| R-hsa-76009        | Platelet aggregation (plug formation)                                  | 4.27E-04 | FGA/COL1A2/COL1A1                                                                                                                          |
| R-hsa-76002        | Platelet activation, signalling or aggregation                         | 1.23E-02 | FGA/PCDH7/COL1A2/COL1A1                                                                                                                    |
| R-hsa-202733       | Cell surface interactions at the vascular wall                         | 1.31E-02 | CD99/COL1A2/COL1A1                                                                                                                         |
| <b>KEGG</b>        |                                                                        |          |                                                                                                                                            |
| hsa04974           | Protein digestion and absorption                                       | 1.00E-29 | COL25A1/COL7A1/COL4A2/COL14A1/FXYD2/COL15A1/COL5A2/COL22A1/COL17A1/COL9A2/COL8A1/COL4A3/COL11A2/COL2A1/COL1A2/COL4A1/COL19A1/COL3A1/COL1A1 |
| hsa04512           | ECM-receptor interaction                                               | 1.50E-07 | COL4A2/COL9A2/COL4A3/COL2A1/COL1A2/COL4A1/COL1A1                                                                                           |
| hsa04933           | AGE-RAGE signalling pathway in diabetic complications                  | 5.89E-06 | COL4A2/COL4A3/COL1A2/COL4A1/COL3A1/COL1A1                                                                                                  |
| hsa05146           | Amoebiasis                                                             | 5.89E-06 | COL4A2/COL4A3/COL1A2/COL4A1/COL3A1/COL1A1                                                                                                  |
| hsa04510           | Focal adhesion                                                         | 1.56E-05 | COL4A2/COL9A2/COL4A3/COL2A1/COL1A2/COL4A1/COL1A1                                                                                           |
| hsa04926           | Relaxin signalling pathway                                             | 1.56E-05 | COL4A2/COL4A3/COL1A2/COL4A1/COL3A1/COL1A1                                                                                                  |
| hsa05165           | Human papilloma virus infection                                        | 3.21E-04 | COL4A2/COL9A2/COL4A3/COL2A1/COL1A2/COL4A1/COL1A1                                                                                           |

| Pathway identifier | Pathway descriptor          | q value  | Proteins included                                |
|--------------------|-----------------------------|----------|--------------------------------------------------|
| hsa04151           | PI3K-Akt signalling pathway | 4.28E-04 | COL4A2/COL9A2/COL4A3/COL2A1/COL1A2/COL4A1/COL1A1 |
| hsa04611           | Platelet activation         | 2.22E-03 | FGA/COL1A2/COL3A1/COL1A1                         |
| hsa05222           | Small cell lung cancer      | 9.72E-03 | COL4A2/COL4A3/COL4A1                             |

Abbreviations: ECM, extracellular matrix; NCAM1, neural adhesion molecule-1; MET, MET proto-oncogene, receptor tyrosine kinase; PTK2, protein tyrosine kinase 2; PDGF, platelet derived growth factor; AGE-RAGE, advanced glycation end product-receptor for advanced glycation end products; PI3K, phosphatidylinositol 3-kinase; Akt, protein kinase B. Pathway analysis was performed using the databases of Reactome (<https://reactome.org>) and the Kyoto Encyclopaedia of Genes and Genomes (<https://www.genome.jp/kegg>).



**Table 9: Characteristics of FLEMENGHO participants analysed and not analysed**

| Characteristics                    | Analysed<br>(n=778 of 778) | Not analysed<br>(n=360 of 413) | p value |
|------------------------------------|----------------------------|--------------------------------|---------|
| Number (%)                         |                            |                                |         |
| Women                              | 395 (50.8%)                | 186 (51.7%)                    | 0.84    |
| Smokers                            | 176 (22.6%)                | 100 (27.8%)                    | 0.063   |
| Hypertension                       | 278 (35.7%)                | 104 (28.9%)                    | 0.026   |
| Treated hypertension               | 146 (18.8%)                | 60 (16.7%)                     | 0.41    |
| Mean (SD) of characteristic        |                            |                                |         |
| Age, year                          | 46.2 (16.2)                | 38.8 (19.2)                    | <0.0001 |
| Body mass index, kg/m <sup>2</sup> | 25.7 (4.0)                 | 25.7 (5.7)                     | 0.84    |
| Waist circumference, cm            | 83.1 (11.0)                | 82.9 (15.1)                    | 0.77    |
| Systolic pressure, mm Hg           | 128.1 (16.5)               | 124.5 (16.2)                   | 0.00056 |
| Diastolic pressure, mm Hg          | 78.9 (10.3)                | 75.9 (10.8)                    | <0.0001 |
| Mean arterial pressure, mm Hg      | 95.3 (10.9)                | 92.1 (11.5)                    | <0.0001 |
| Serum creatinine, µmol/l           | 86.8 (14.7)                | 87.7 (17.7)                    | 0.35    |
| eGFR, ml/min/1.73 m <sup>2</sup>   | 85.1 (19.2)                | 88.8 (23.3)                    | 0.0044  |
| Plasma glucose, mmol/l             | 5.04 (0.98)                | 5.14 (1.55)                    | 0.15    |
| Total serum cholesterol, mmol/l    | 5.29 (1.09)                | 5.25 (1.14)                    | 0.48    |
| HDL serum cholesterol, mmol/l      | 1.40 (0.39)                | 1.37 (0.37)                    | 0.23    |
| Total-to-HDL cholesterol ratio     | 4.07 (1.42)                | 4.12 (1.50)                    | 0.64    |
| Median of characteristic (IQR)     |                            |                                |         |
| γ-glutamyltransferase, U/l         | 20.6 (13.0-30.0)           | 18.1 (12.0-25.0)               | 0.0016  |

Analysed refers to 778 FLEMENGHO participants examined in 2005-2010 and making up the derivation and synchronous internal validation datasets. Not analysed refers to: (i) participants ineligible for follow-up, because they had passed away (n=26), were incapacitated (n=27), or had moved out of the area (n=100); (ii) because they declined renewed participation (n=227); or because they were excluded from analysis, because of missing UPP data (n=24) or because of missing (n=9) or unreliably recorded (n=17) covariables. The characteristics listed were extracted from a foregoing examination (1996-2005). The earlier data were available for all analysed participants but only for 360 of 413 participants (87.2%) not analysed. Hypertension was a blood pressure of  $\geq 140$  mm Hg systolic or  $\geq 90$  mm Hg diastolic or use of antihypertensive drugs. The glomerular filtration rate was derived from serum creatinine, using the Chronic Kidney Disease Epidemiology Collaboration equation. To convert eGFR from ml/min to ml/s, multiply by 0.0167. p values refer to the difference between participants analysed and not analysed.

### **FLEMENGHO TIMELINES**

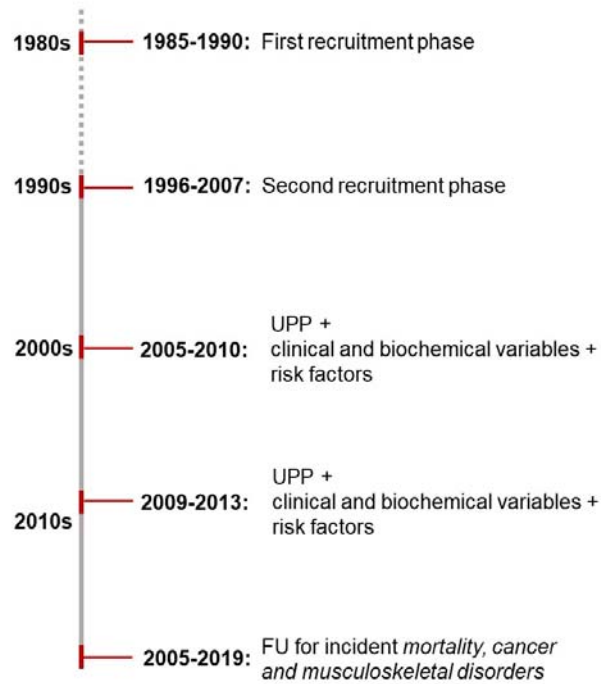

#### **Timelines**

Abbreviations: FLEMENGHO, Flemish Study of Environment, Genes and Health Outcomes; UPP, urinary proteomic profiling; FU, follow-up.

### **Analysis strategy**

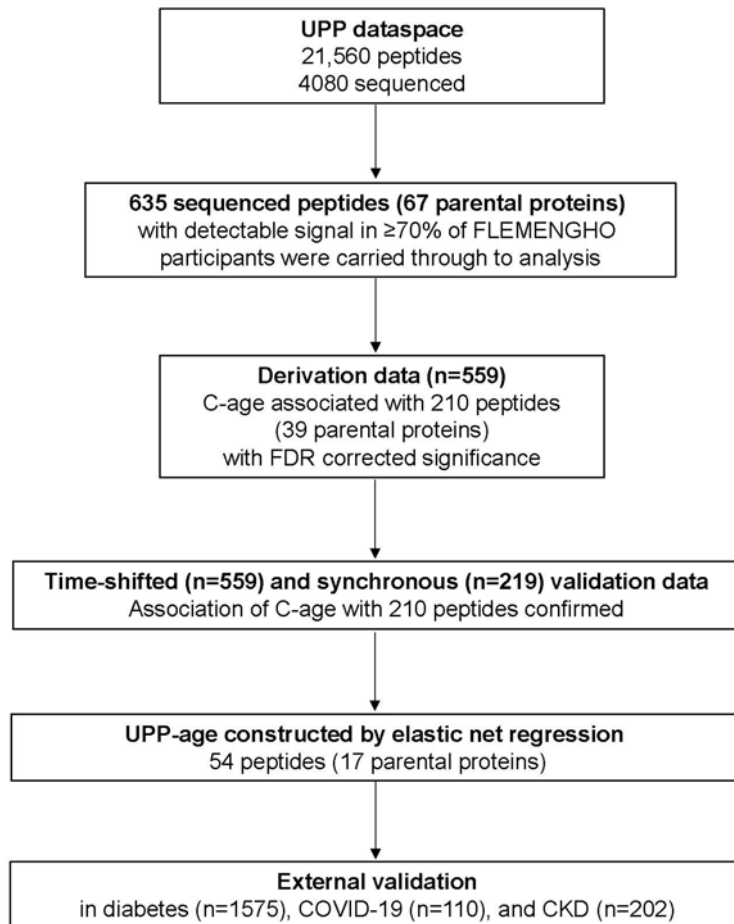

**Figure 2:**

#### **Analysis strategy**

Abbreviations: FLEMENGHO, Flemish Study on Environment, Genes and Health Outcomes; C-age, chronological age; FDR, false discovery rate; CKD, chronic kidney disease.

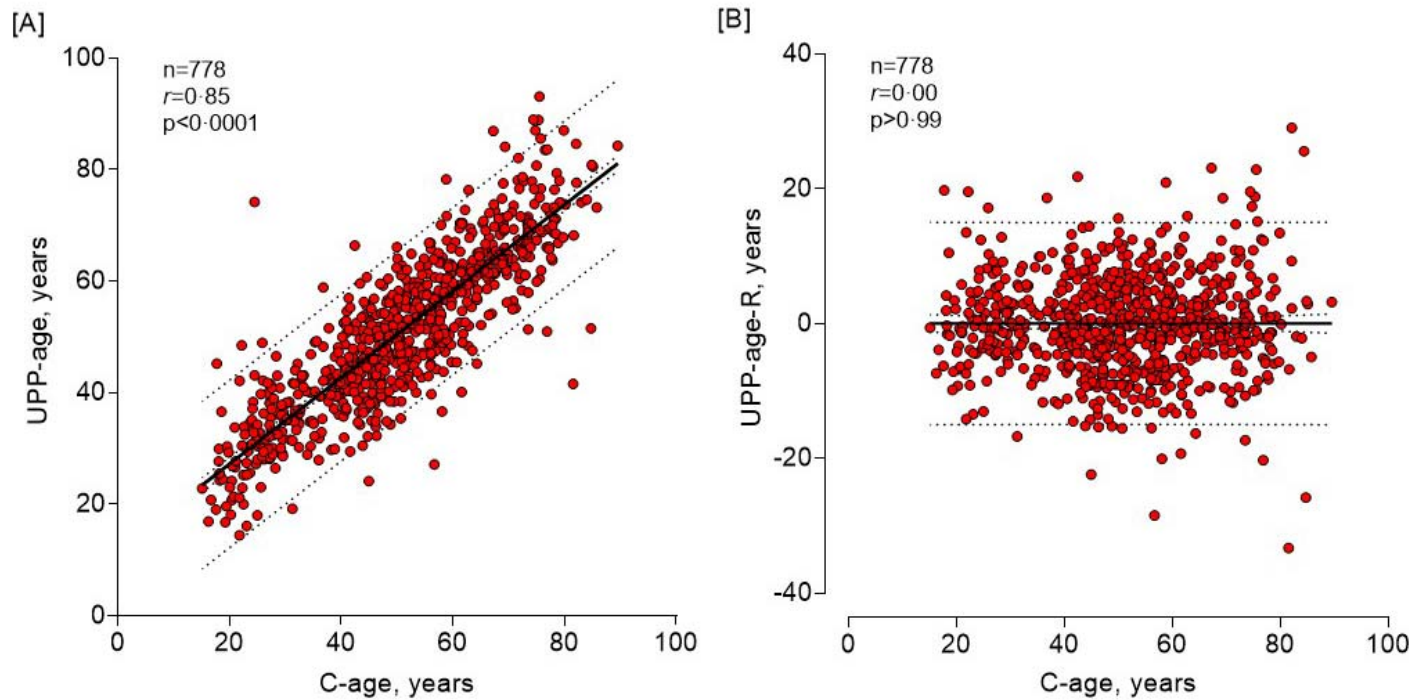

**Figure 3:**

**Residual plot of UPP-age on C-age**

UPP-age is associated with C-age (panel A). The residual plot of this association (panel B) shows that by removing the variability in UPP-age explained by C-age (UPP-age-R obtained by regressing UPP-age on C-age) removes the association, whereby the correlation coefficient drops from 0.85 ( $p<0.0001$ ) to 0.00 ( $p>0.99$ ). UPP-age-R therefore reflects the part of ageing that is not explained by chronological age (C-age).

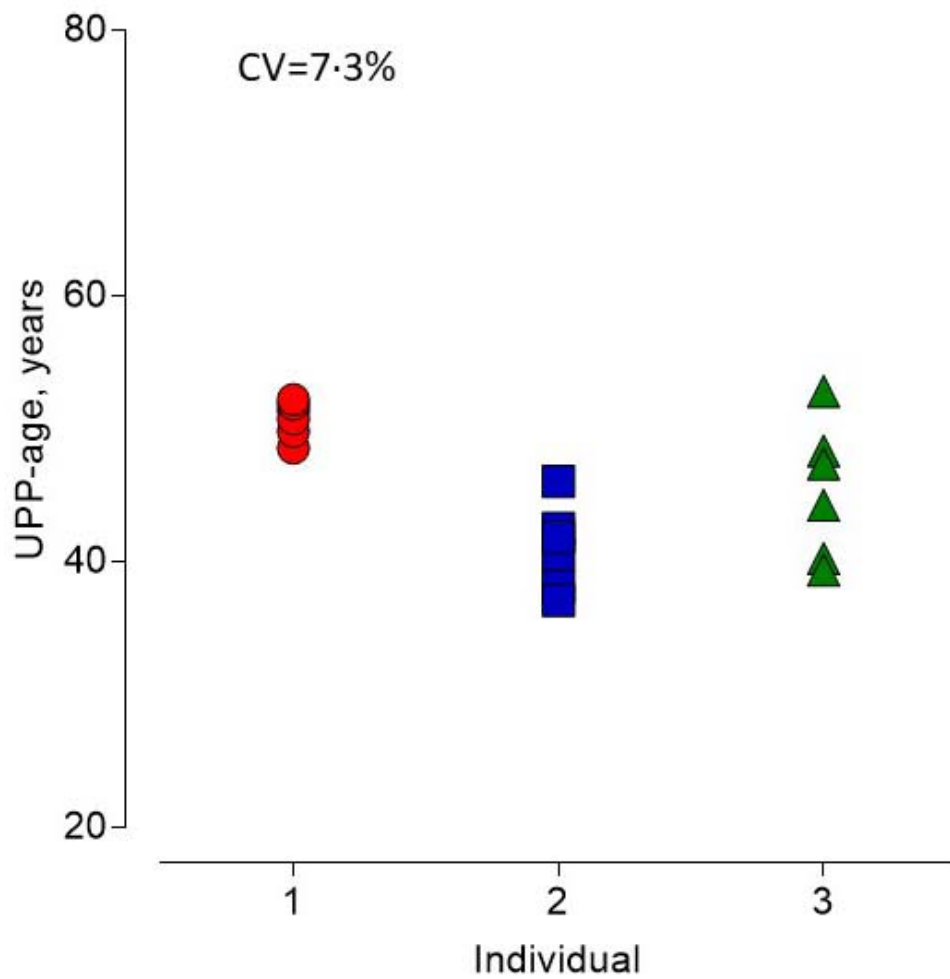

**Figure 4:**

**Short-term reproducibility of the UPP ageing biomarker**

The coefficient of variation of UPP-age was determined in three healthy individuals not included in the population or patient cohorts, who each underwent UPP profiling on mid-morning urine samples collected on six different days within a 1-month time span. The within individual coefficients of variation ranged from 2.7 to 11.3% and averaged (SE) 7.3 (2.5)%, indicating satisfactory short-term reproducibility.

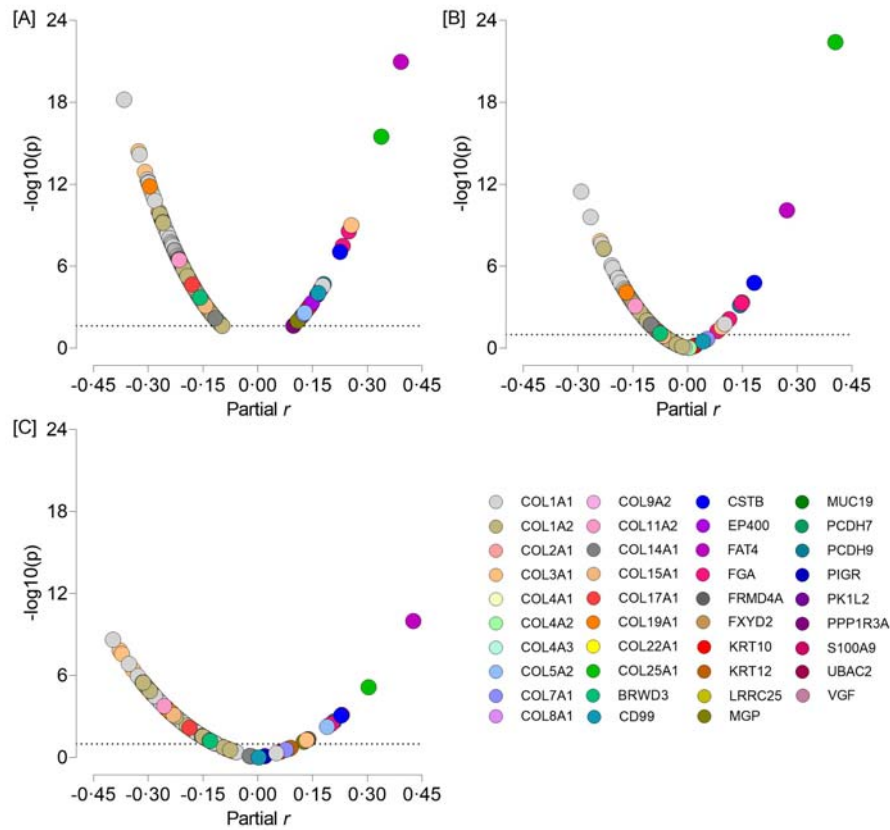

**Figure 5:**

**Volcano plots for FLEMENGHO derivation (A) and time-shifted (B) and synchronous (C) internal validation datasets**

Dotted lines indicate the level of significance required in the different stages of the analysis. The partial correlation coefficients plotted along the horizontal axis were derived from the regression model in table 2. The proteins identified from the peptide fragments were colour-coded as indicated in the legend.
